# Supplementary material for: Differences in Grain Microstructure and Proteomics of a Broad Bean (Vicia faba L.) Landrace Cixidabaican in China Compared with Lingxiyicun Introduced from Japan
Source: MDPI journal article supplement (doi:10.3390/plants10071385), 2021-07-06
Supplement: s1 [file s1]

**Table S1** Development dynamics of Cixidabaican (CX) and Lingxiyicun (LX) during the whole growth period.

| Variety            | Sowing   | Emergence | Branch   | Anthesis  | Harvest           |
|--------------------|----------|-----------|----------|-----------|-------------------|
| Year 1: 2018- 2019 |          |           |          |           |                   |
| LX                 | Oct 24th | Nov 10th  | Jan 19th | March 2nd | Apr 27th, May 3rd |
| CX                 | Oct 24th | Nov 8th   | Jan 18th | Feb 28th  | Apr 27th, May 3rd |
| Year 2: 2019-2020  |          |           |          |           |                   |
| LX                 | Oct 25th | Nov 12th  | Jan 20th | March 4th | Apr 29th, May 3rd |
| CX                 | Oct 25th | Nov 9th   | Jan 19th | March 2nd | Apr 29th, May 3rd |

**Table S2** Comparison of plant height, stem width, pod length, pod width, seed length, seed width and seed thickness between Cixidabaican (CX) and Lingxiyicun (LX), and the ANOVA analysis of the effect of year, variety and their interactions.

| Variety                                  | Plant height<br>(cm) | Stem width<br>(mm) | Pod length<br>(cm) | Pod width<br>(cm) | Seed length<br>(mm) | Seed width<br>(mm) | Seed thickness<br>(mm) |
|------------------------------------------|----------------------|--------------------|--------------------|-------------------|---------------------|--------------------|------------------------|
| Year 1: 2018- 2019                       |                      |                    |                    |                   |                     |                    |                        |
| LX                                       | 94.33                | 12.50              | 14.42              | 2.48              | 25.96               | 18.87              | 9.91                   |
| CX                                       | 143.00 ***           | 12.20              | 9.58 ***           | 1.99 ***          | 22.44 ***           | 15.32 ***          | 8.07 ***               |
| Year 2: 2019-2020                        |                      |                    |                    |                   |                     |                    |                        |
| LX                                       | 93.41                | 12.29              | 13.57              | 2.67              | 26.19               | 19.27              | 10.49                  |
| CX                                       | 141.73 ***           | 12.07              | 9.71 ***           | 2.22 ***          | 23.63 ***           | 16.97 ***          | 8.83 ***               |
| Average of the 2 Years Field Experiments |                      |                    |                    |                   |                     |                    |                        |
| LX                                       | 93.87                | 12.39              | 14.00              | 2.58              | 26.08               | 19.07              | 10.19                  |
| CX                                       | 142.37 ***           | 12.14              | 9.65 ***           | 2.11 ***          | 23.04 ***           | 16.15 ***          | 8.45 ***               |
| <b>F value / P</b>                       |                      |                    |                    |                   |                     |                    |                        |
| Year                                     | 0.49 / ns            | 4.56/ns            | 12.62/*            | 36.45/**          | 16.81/**            | 99.78/**           | 32.57/**               |
| Variety                                  | 955.53 / ***         | 7.47/ns            | 1620.05/***        | 208.18/***        | 325.36/***          | 872.17/***         | 224.46/***             |
| Year × Variety                           | 0.01/ns              | 0.07/ns            | 20.06/**           | 0.38/ns           | 8.17/*              | 42.44/***          | 0.35/ns                |

\*, \*\*, and \*\*\*, Significance at  $P \leq 0.05$ , 0.01 and 0.001, respectively; ns, no significance.

**Table S3** Comparison of pods number per plant, single-seed pods ratio, pod weight per plant, seeds number per pod, single seed fresh weight, single seed dry weight, seeds number per plant and seed yield per plant between Cixidabaican (CX) and Lingxiyicun (LX), and the ANOVA analysis of the effect of year, variety and their interactions.

| Variety                                  | Pods per plant | Pod weight per plant (g) | Seeds per pod | Single seed fresh weight (g) | Single seed dry weight (g) | Seeds per plant | Seed yield per plant (g) |
|------------------------------------------|----------------|--------------------------|---------------|------------------------------|----------------------------|-----------------|--------------------------|
| Year 1: 2018- 2019                       |                |                          |               |                              |                            |                 |                          |
| LX                                       | 34.21          | 727.90                   | 2.08          | 3.37                         | 2.24                       | 70.8            | 237.8                    |
| CX                                       | 79.52 ***      | 856.51 ***               | 1.68 ***      | 2.43 ***                     | 1.45 ***                   | 133.8 ***       | 325.6 **                 |
| Year 2: 2019-2020                        |                |                          |               |                              |                            |                 |                          |
| LX                                       | 34.67          | 659.87                   | 2.32          | 3.62                         | 2.31                       | 80.32           | 291.64                   |
| CX                                       | 81.33 ***      | 757.47 ***               | 1.86 ***      | 2.54 ***                     | 1.53 ***                   | 146.67 ***      | 373.39 **                |
| Average of the 2 Years Field Experiments |                |                          |               |                              |                            |                 |                          |
| LX                                       | 34.44          | 639.89                   | 2.20          | 3.50                         | 2.28                       | 75.56           | 264.72                   |
| CX                                       | 80.43          | 807.00                   | 1.77 ***      | 2.49 ***                     | 1.49 ***                   | 140.24 ***      | 349.50 **                |
| <b>F value/P</b>                         |                |                          |               |                              |                            |                 |                          |
| Year                                     | 0.248/ns       | 24.53/**                 | 8.75/*        | 12.76/*                      | 4.82/ns                    | 5.22/ns         | 8.02/*                   |
| Variety                                  | 295.26/***     | 45.04/***                | 36.695/***    | 378.91/***                   | 484.37/***                 | 176.12/***      | 22.22/**                 |
| Year × variety                           | 0.06/ns        | 0.82/ns                  | 0.22/ns       | 1.91/ns                      | 0.002/ns                   | 0.10/ns         | 0.03/ns                  |

\*, \*\*, and \*\*\*, Significance at  $P \leq 0.05$ , 0.01 and 0.001, respectively; ns, no significance.

**Table S4** Amino acid composition of Cixidabaican (CX) and Lingxiyicun (LX), in mg/100 g seed dry weight.

| Amino acid          | Cixidabaican (CX) | Lingxiyicun (LX) |
|---------------------|-------------------|------------------|
| Valine (Val)        | 486.97 ± 30.25    | 500.83 ± 50.10   |
| Tyrosine (Tyr)      | 215.19 ± 15.76    | 218.13 ± 37.38   |
| Threonine (Thr)     | 401.83 ± 13.84    | 385.11 ± 28.31   |
| Serine (Ser)        | 487.93 ± 14.32    | 463.20 ± 29.39   |
| Proline (Pro)       | 346.42 ± 12.66    | 356.30 ± 30.90   |
| Phenylalanine (Phe) | 445.67 ± 19.25    | 454.94 ± 43.02   |
| Methionine (Met)    | 43.01 ± 9.18      | 36.26 ± 15.13    |
| Lysine (Lys)        | 740.18 ± 28.15    | 741.66 ± 66.36   |
| Leucine (Leu)       | 778.15 ± 32.56    | 759.20 ± 64.24   |
| Isoleucine (Ile)    | 413.17 ± 28.20    | 426.58 ± 42.84   |
| Histidine (His)     | 287.58 ± 11.11    | 284.80 ± 27.33   |
| Glycine (Gly)       | 458.36 ± 19.18    | 449.89 ± 36.54   |
| Glutamic (Glu)      | 1800.32 ± 70.43   | 1721.10 ± 126.99 |
| Cystine (Cys)       | 66.01 ± 6.33      | 71.49 ± 5.67     |
| Aspartic (Asp)      | 1108.46 ± 51.74   | 1029.71 ± 82.38  |
| Arginine (Arg)      | 976.84 ± 41.24    | 945.70 ± 96.23   |
| Alanine (Ala)       | 472.69 ± 16.26    | 469.20 ± 38.08   |
| E/T (%)             | 0.347 ± 0.002     | 0.355 ± 0.003    |

E/T (%) represent the proportion of essential amino acids to total amino acids.

**Table S5** Overview of protein identification by iTRAQ.

| Sample     | Total   | Spectra | Unique  | Peptide | Unique  | Protein |
|------------|---------|---------|---------|---------|---------|---------|
|            | spectra |         | spectra |         | peptide |         |
| Vicia faba | 844,748 | 2,013   | 1,919   | 809     | 775     | 521     |

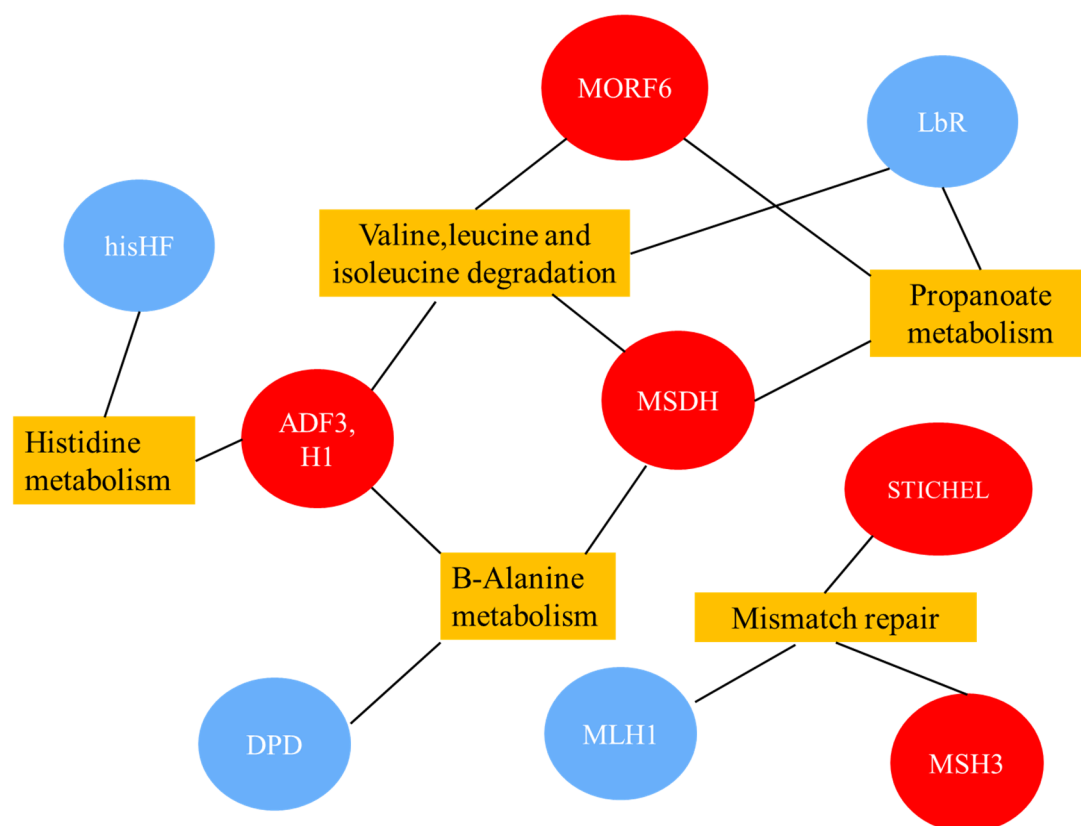

**Figure S1** Pathway interactions among Valine, leucine and isoleucine degradation,  $\beta$ -Alanine metabolism, Histidine metabolism, Mismatch repair and Propanoate metabolism. Orange squares represent pathways. Proteins in red and blue circle represent significant higher- and lower-expression. hisHF, imidazole glycerol phosphate synthase hisHF; MORF6, multiple organellar RNA editing factor 6-like; LbR, leghemoglobin reductase-like; ADF3, aldehyde dehydrogenase family 3 member H1; MSDH, methylmalonate-semialdehyde dehydrogenase [acylating]; STICHEL, protein STICHEL-like 2; DPD, dihydropyrimidine dehydrogenase (NADP (+)); MLH1, DNA mismatch repair protein MLH1; MSH3, DNA mismatch repair protein MSH3 isoform X2.
