# Supplementary material for: Differences in Grain Microstructure and Proteomics of a Broad Bean (Vicia faba L.) Landrace Cixidabaican in China Compared with Lingxiyicun Introduced from Japan
Source: Plants (Basel). 2021 Jul 6;10(7):1385. doi: 10.3390/plants10071385 (PMC8309391; doi:10.3390/plants10071385)
Supplement: Supplementary file 1 [file plants-10-01385-s001.zip]

Archive with 5 entries (5 files):
- animo acids contents raw data.xls
- crude protein contents raw data.xlsx
- proteomics data.xls
- scanning electron microscopy.png
- Supplementary materials R4.pdf
