# Supplementary material for: Differences in Grain Microstructure and Proteomics of a Broad Bean (Vicia faba L.) Landrace Cixidabaican in China Compared with Lingxiyicun Introduced from Japan
Source: Plants (Basel). 2021 Jul 6;10(7):1385. doi: 10.3390/plants10071385 (PMC8309391; doi:10.3390/plants10071385)
Supplement: Supplementary file 1 [file plants-10-01385-s001.zip › animo acids contents raw data.xls]

## Sheet: Sheet1
CX-1
Pk #	RT	Name	Height	Area	nmol/20ul	ng/20ul
1	4.873	Asp	676314	11926041	8.5	1131.41
2	5.58	Thr	268417	5064720	3.362	400.4
3	6.213	Ser	359024	6892234	4.546	477.768
4	6.88	Glu	826527	18584303	12.374	1820.28
5	9.993	Gly	314724	9092946	6.209	466.286
6	10.847	Ala	181747	7124023	5.33	474.937
7	12.247	Cys	24725	372534	0.251	60.408
8	12.773	Val	314029	6133340	4.359	510.44
9	13.893	Met	19622	482300	0.329	49.132
11	16.1	Ile	137551	4690714	3.317	435.243
12	17.173	Leu	210011	8832204	5.985	785.269
13	18.5	Tyr	42484	1810362	1.286	233.032
14	19.647	Phe	153101	3890703	2.677	442.305
15	20.867	g-ABA	2863	77817	0.052	5.382
17	22.287	Lys	412719	7949873	5.083	743.099
18	23.76	NH3	304484	9330534	12.216	207.666
19	24.527	His	109760	2747825	1.866	289.655
20	28.613	Arg	228049	8058639	5.774	1005.86
1	7.56	Pro	47789	859816	3.046	350.647
CX-2
Pk #	RT	Name	Height	Area	nmol/20ul	ng/20ul
2	4.88	Asp	679939	12012695	8.562	1139.63
3	5.587	Thr	280532	5295882	3.515	418.675
4	6.227	Ser	381664	7328154	4.833	507.986
5	6.887	Glu	843269	19011198	12.659	1862.09
6	10.013	Gly	317669	9258198	6.322	474.761
7	10.867	Ala	187012	7344140	5.495	489.611
8	12.233	Cys	29819	460553	0.311	74.681
9	12.773	Val	306377	5970509	4.243	496.888
10	13.887	Met	19815	483807	0.33	49.286
12	16.107	Ile	133678	4539129	3.21	421.178
13	17.18	Leu	217132	9104150	6.17	809.447
14	18.5	Tyr	40758	1735803	1.233	223.435
15	19.647	Phe	161154	4135290	2.846	470.11
16	20.813	g-ABA	3494	94488	0.063	6.535
18	22.287	Lys	422912	8215530	5.253	767.931
19	23.767	NH3	347257	10661942	13.959	237.299
20	24.527	His	112767	2825284	1.919	297.82
21	28.62	Arg	228340	8074888	5.786	1007.89
1	7.567	Pro	49144	882933	3.128	360.074
CX-3
Pk #	RT	Name	Height	Area	nmol/20ul	ng/20ul
1	4.88	Asp	676026	11929359	8.503	1131.73
2	5.587	Thr	270273	5101782	3.386	403.33
3	6.227	Ser	367354	7046953	4.648	488.493
4	6.88	Glu	827713	18581285	12.372	1819.98
5	10.007	Gly	311118	9001622	6.147	461.603
6	10.867	Ala	181162	7135595	5.339	475.708
7	12.24	Cys	26994	410692	0.277	66.596
8	12.78	Val	307857	5983915	4.253	498.004
9	13.893	Met	17441	430488	0.294	43.854
11	16.1	Ile	134705	4574112	3.235	424.424
12	17.18	Leu	210714	8834816	5.987	785.501
13	18.5	Tyr	37654	1594243	1.133	205.213
14	19.633	Phe	154313	3931908	2.706	446.989
15	20.84	g-ABA	3061	80446	0.054	5.564
17	22.273	Lys	412657	8008587	5.12	748.587
18	23.753	NH3	304489	9310516	12.189	207.22
19	24.513	His	110200	2761051	1.875	291.049
20	28.6	Arg	220910	7804435	5.592	974.129
1	7.567	Pro	47408	846288	2.999	345.13
CX-4
Pk #	RT	Name	Height	Area	nmol/20ul	ng/20ul
1	4.867	Asp	612654	10868190	7.746	1031.06
2	5.573	Thr	258309	4868637	3.232	384.899
3	6.207	Ser	359718	6887713	4.543	477.454
4	6.867	Glu	772052	17345285	11.549	1698.92
5	9.98	Gly	292802	8400361	5.736	430.771
6	10.827	Ala	172158	6757343	5.056	450.491
7	12.233	Cys	25257	384653	0.26	62.373
8	12.767	Val	273583	5317334	3.779	442.529
9	13.873	Met	12131	292324	0.2	29.779
11	16.087	Ile	118888	4007498	2.834	371.849
12	17.153	Leu	197657	8237209	5.582	732.368
13	18.473	Tyr	36210	1546641	1.099	199.086
14	19.62	Phe	144361	3723299	2.562	423.274
15	20.813	g-ABA	3340	92911	0.062	6.426
17	22.26	Lys	383638	7500453	4.795	701.09
18	23.733	NH3	340578	10406909	13.625	231.622
19	24.487	His	102638	2578329	1.751	271.788
20	28.573	Arg	208582	7366664	5.278	919.487
1	7.547	Pro	44977	808808	2.866	329.845
LX-1
Pk #	RT	Name	Height	Area	nmol/20ul	ng/20ul
2	4.873	Asp	588494	10510957	7.492	997.166
3	5.587	Thr	236900	4515585	2.997	356.987
4	6.22	Ser	324278	6272727	4.137	434.824
5	6.88	Glu	723493	16388586	10.912	1605.21
6	10.007	Gly	277809	8110137	5.538	415.888
7	10.86	Ala	162393	6460932	4.834	430.73
8	12.233	Cys	27397	426186	0.288	69.108
9	12.773	Val	275067	5409923	3.845	450.234
10	13.88	Met	16099	394954	0.27	40.234
12	16.1	Ile	121572	4127923	2.919	383.023
13	17.18	Leu	187178	7832349	5.308	696.372
14	18.493	Tyr	32463	1387467	0.986	178.597
15	19.64	Phe	142019	3651374	2.513	415.097
16	20.82	g-ABA	4088	105927	0.071	7.326
18	22.28	Lys	370374	7232819	4.624	676.074
19	23.767	NH3	355495	10869525	14.231	241.919
20	24.513	His	97489	2463704	1.673	259.705
21	28.613	Arg	188626	6665530	4.776	831.974
1	7.56	Pro	43677	794294	2.814	323.926
LX-2
Pk #	RT	Name	Height	Area	nmol/20ul	ng/20ul
1	4.887	Asp	679380	12019798	8.567	1140.31
2	5.593	Thr	281410	5303407	3.52	419.27
3	6.227	Ser	374320	7178047	4.734	497.58
4	6.887	Glu	868398	19407012	12.922	1900.86
5	10.013	Gly	340219	9729225	6.643	498.915
6	10.873	Ala	198782	7760568	5.807	517.373
7	12.233	Cys	30304	476841	0.322	77.322
8	12.773	Val	350644	6822350	4.849	567.782
9	13.887	Met	17479	429706	0.293	43.774
11	16.1	Ile	154685	5218809	3.691	484.244
12	17.173	Leu	227709	9491536	6.432	843.89
13	18.5	Tyr	39206	1678500	1.192	216.059
14	19.64	Phe	175519	4510401	3.104	512.753
15	20.813	g-ABA	4717	109593	0.074	7.58
17	22.287	Lys	459350	8889886	5.684	830.965
18	23.773	NH3	499428	15275521	19.999	339.981
19	24.52	His	122748	3059877	2.078	322.549
20	28.62	Arg	235882	8313316	5.957	1037.65
1	7.567	Pro	53652	960714	3.404	391.795
LX-3
Pk #	RT	Name	Height	Area	nmol/20ul	ng/20ul
1	4.887	Asp	561165	9969977	7.106	945.844
2	5.6	Thr	265005	5018205	3.331	396.723
3	6.24	Ser	359719	6885686	4.542	477.314
4	6.9	Glu	775818	17422089	11.601	1706.44
5	10.04	Gly	310139	8877916	6.062	455.26
6	10.9	Ala	183108	7202882	5.389	480.194
7	12.253	Cys	25240	399119	0.269	64.719
8	12.793	Val	313502	6079529	4.321	505.961
9	13.913	Met	5577	136997	0.094	13.956
11	16.133	Ile	137340	4624572	3.271	429.106
12	17.207	Leu	208327	8670119	5.875	770.858
13	18.52	Tyr	48748	2086660	1.482	268.598
14	19.667	Phe	158192	4056444	2.791	461.146
15	20.84	g-ABA	4199	100157	0.067	6.927
17	22.307	Lys	419699	8000441	5.115	747.826
18	23.8	NH3	401027	12277774	16.074	273.261
19	24.547	His	109639	2710796	1.841	285.751
20	28.647	Arg	231227	8108314	5.81	1012.06
1	7.587	Pro	50203	910569	3.226	371.345
LX-4
Pk #	RT	Name	Height	Area	nmol/20ul	ng/20ul
1	4.893	Asp	614840	10915348	7.78	1035.53
2	5.607	Thr	245675	4648199	3.085	367.471
3	6.247	Ser	333424	6391871	4.216	443.083
4	6.9	Glu	758689	17069441	11.366	1671.9
5	10.04	Gly	289047	8375156	5.719	429.478
6	10.9	Ala	170092	6727685	5.034	448.514
7	12.24	Cys	29351	461297	0.311	74.801
8	12.787	Val	293665	5759843	4.094	479.356
9	13.9	Met	18886	461978	0.315	47.062
11	16.12	Ile	130213	4417980	3.125	409.937
12	17.2	Leu	195251	8162036	5.531	725.684
13	18.513	Tyr	38250	1625876	1.155	209.285
14	19.653	Phe	148496	3789326	2.608	430.78
15	20.833	g-ABA	3659	82833	0.056	5.729
17	22.3	Lys	389830	7614574	4.868	711.758
18	23.793	NH3	337106	10270255	13.446	228.581
19	24.54	His	103083	2572532	1.747	271.177
20	28.64	Arg	204502	7219423	5.173	901.109
1	7.587	Pro	45762	829140	2.938	338.137
