# Supplementary material for: Differences in Grain Microstructure and Proteomics of a Broad Bean (Vicia faba L.) Landrace Cixidabaican in China Compared with Lingxiyicun Introduced from Japan
Source: Plants (Basel). 2021 Jul 6;10(7):1385. doi: 10.3390/plants10071385 (PMC8309391; doi:10.3390/plants10071385)
Supplement: Supplementary file 1 [file plants-10-01385-s001.zip › crude protein contents raw data.xlsx]

## Sheet: Sheet1
	weight/g	variety	V/ml	HCL concentration		protein contents
1	1.002	CX	29.53	0.1151mol/L		0.2965
2	1.003	CX	30.08			0.3017
3	1.001	CX	29.69			0.2984
5	1	CX	28.67			0.2884
6	1.001	CX	28.94			0.2908
7	1	LX	30.95			0.3113				Mean	SD
8	1	LX	29.98			0.3016			CX	0.2951	0.00547202
14	1.001	LX	30.52			0.3067			LX	0.3077	0.004004
15	1	LX	30.95			0.3113
16	1	LX	30.59			0.3077
