# Supplementary material for: Differences in Grain Microstructure and Proteomics of a Broad Bean (Vicia faba L.) Landrace Cixidabaican in China Compared with Lingxiyicun Introduced from Japan
Source: Plants (Basel). 2021 Jul 6;10(7):1385. doi: 10.3390/plants10071385 (PMC8309391; doi:10.3390/plants10071385)
Supplement: Supplementary file 1 [file plants-10-01385-s001.zip › proteomics data.xls]

## Sheet: raw data
No.	Protein_ID	Description	Mean_Ratio_CX-VS-RB	Mass	Protein_Coverage	Uniq_Pep_Num	Uniq_Spec_Num	Sameset	SD_CX-VS-RB	Quant_Num_CX-VS-RB	Pvalue_CX-VS-RB	Protein_ID	Protein_Sequence	NCBInr Identity	NCBInr E-value	NCBInr Accession	NCBInr Description	Swissprot Identity	Swissprot E-value	Swissprot Accession	Swissprot Description	Protein_or_Domain	KOG Score	KOG E-value	KOG ID	KOG Function-Description	KOG Code	KOG Function-Categories	KEGG(ko_id|rank|evalue|score|subject_id|ko_definition)	GO Biological_Process	GO Molecular_Function	GO Cellular_Component
135	XP_003550821.1	leghemoglobin reductase-like [Glycine max]	0.81	53178.6	0.026	1	1	NP_001237764.1	0.203	9	0.01733	XP_003550821.1	MAMASLARRKGYAVVLSSRSSFCLTSWRGFASGSDENDVVVIGGGPGGYVAAIKAAQLGLKTTCIEKRGTLGGTCLNVGCIPSKALLHSSHMYHEAKHAFANHGVKFSSVEVDLPAMMAQKDKAVSNLTKGIEGLFKKNKVNYVKGYGKFVSPSEVSVDTTEGGNTVVKGKHIIIATGSDVKSLPGVTIDEKKVVSSTGALALTEIPKRLVVIGAGYIGLEMGSVWGRLGTEITVVEFASEIVPTMDAEVRKQFQRSLEKQGLKFKLKTKVVGVDTSGDGVKLTLEPAAGGDQTTLEADVVLVSAGRTPFTAGLGLDKIGVETDKIGRILVNERFATNVSGVYAIGDVIPGPMLAHKAEEDGVACVEYIAGKVGHVDYDKVPGVVYTMPEVASVGKTEE…	100	0	XP_003550821.1	PREDICTED: leghemoglobin reductase-like [Glycine max]	92.76	0	sp|Q41219|LEGRE_SOYBN	Leghemoglobin reductase OS=Glycine max GN=FLBR PE=1 SV=1	At3g17240	860	0	KOG1335	Dihydrolipoamide dehydrogenase	C	Energy production and conversion	K00382|1|0.0|1013|gmx:100788043|dihydrolipoamide dehydrogenase [EC:1.8.1.4]	GO:0045454//cell redox homeostasis	GO:0050660//flavin adenine dinucleotide binding;GO:0015043//leghemoglobin reductase activity;GO:0004148//dihydrolipoyl dehydrogenase activity;GO:0009055//electron transfer activity	GO:0005739//mitochondrion;GO:0005623//cell
403	XP_003525164.1	ribonuclease TUDOR 1-like [Glycine max]	0.8	108892	0.01	1	1	XP_003532288.1	0.187	9	0.0156	XP_003525164.1	MASSASGATGWYRGKVKSVPSGDCVVIMAMPTGKPGPLPEKSITLSSLMAPRLARRGGVDEPFAWESREFLRKLCIGKEVAFRVDYTVPSINRDFGTVFIGDKNVAMLVVSAGWAKIREQGQQKGEASPYLAELLRLEEQAKQEGLGRWSKIPGAAEASIRNLPPSAIGDSSNFNARDLLHANKGRPMEGIVEQVRDGSTLRVYLLPEFQFVQVFVAGIQAPQMGRRAVPESVAEPEVTADATNGDVTGEPRAPLTSAQKLAASASASAETAADPFAPEAKFFTEIRVLNRDVRIVLEGVDKFNNLIGSVYYPDGDSAKDLALELVENGFAKYVEWSANMMEEEAKRKLKTSELQAKKNRLKIWTNYVPPATNSKAIHDQNFTGKVVEVVSGDCIIVAD…	100	0	XP_003525164.1	PREDICTED: staphylococcal nuclease domain-containing protein 1-like [Glycine max]	72.84	0	sp|Q8VZG7|TSN1_ARATH	Ribonuclease TUDOR 1 OS=Arabidopsis thaliana GN=TSN1 PE=1 SV=1	At5g07350	1453	0	KOG2039	Transcriptional coactivator p100	K	Transcription	K15979|1|0.0|2031|gmx:100809534|staphylococcal nuclease domain-containing protein 1	GO:0031047//gene silencing by RNA;GO:0006401//RNA catabolic process	GO:0004518//nuclease activity	GO:0005737//cytoplasm;GO:0005634//nucleus;GO:0016442//RISC complex
267	NP_001237229.1	40S ribosomal protein S13 [Glycine max]	0.79	17168.5	0.113	1	1	-	0.271	9	0.03818	NP_001237229.1	MGRMHSRGKGISSSALPYKRTPPSWLKISSQDVEENICKFAKKGLTPSQIGVILRDSHGIAQVNSVTGSKILRILKAHGLAPEIPEDLYHLIKKAVSIRKHLERNRKDKDSKFRLILVESRIHRLARYYKKTKKLPPVWKYESTTASTLVA	100	6e-107	NP_001237229.1	40S ribosomal protein S13 [Glycine max]	100	4e-109	sp|P62302|RS13_SOYBN	40S ribosomal protein S13 OS=Glycine max GN=RPS13 PE=2 SV=1	At4g00100	280	3e-98	KOG0400	40S ribosomal protein S13	J	Translation, ribosomal structure and biogenesis	K02953|1|1e-107|306|gmx:100790163|small subunit ribosomal protein S13e	GO:0006412//translation	GO:0070181//small ribosomal subunit rRNA binding;GO:0003735//structural constituent of ribosome	GO:0022627//cytosolic small ribosomal subunit;GO:0005730//nucleolus;GO:0005840//ribosome
268	XP_003540396.1	ketol-acid reductoisomerase, chloroplastic [Glycine max]	0.79	63668.4	0.043	2	3	NP_001276286.2	0.183	9	0.01218	XP_003540396.1	MAAATTSYSSAIAASSDTLAKPASTRTFSATNLALQSSSSKLGFKSLKLHRCAAAAGSALGARMVSAPAVKAPALLDFDTKVFKKEKINLAGHDEYIVKGGRDLFHLLPDAFKGIKQIGVIGWGSQGPAQAQNLRDSLAEAKSDIVVKIGLRKGSRSFAEARAAGFSEENGTLGDIWETVSGSDLVMLLISDSAQADNYEKILSHMKPNSILGLSHGFLLGHLQSLGLDFPKNISVIAVCPKGMGPSVRRLYVQGKEINGAGINASFAVHQDVDGRATDVALGWSVALGSPFTFATTLEQEYRSDIFGERGILLGAVHGVVESLFRRYTDNGMNEDLAYKNTVESITGIISKTISTKGMLAVYNALSEDEKREFEKAYSASYYPCMEILYECYEDVASG…	100	0	XP_003540396.1	PREDICTED: ketol-acid reductoisomerase, chloroplastic-like [Glycine max]	85.42	0	sp|O82043|ILV5_PEA	Ketol-acid reductoisomerase, chloroplastic OS=Pisum sativum GN=PGAAIR PE=2 SV=1	-	-	-	-	-	-	-	K00053|1|0.0|1207|gmx:100799921|ketol-acid reductoisomerase [EC:1.1.1.86]	GO:0009097//isoleucine biosynthetic process;GO:0009099//valine biosynthetic process	GO:0046872//metal ion binding;GO:0004455//ketol-acid reductoisomerase activity;GO:0016853//isomerase activity	-
274	NP_001235189.1	lipoxygenase [Glycine max]	0.79	96336.8	0.03	1	1	-	0.151	9	0.006146	NP_001235189.1	MTGGMFGRKGQKIKGTVVLMPKNVLDFNAITSVGKGSAKDTATDFLGKGLDALGHAVDALTAFAGHSISLQLISATQTDGSGKGKVGNEAYLEKHLPTLPTLGARQEAFDINFEWDASFGIPGAFYIKNFMTDEFFLVSVKLEDIPNHGTINFVCNSWVYNFKSYKKNRIFFVNDTYLPSATPGPLVKYRQEELEVLRGDGTGKRRDFDRIYDYDIYNDLGNPDGGDPRPIIGGSSNYPYPRRVRTGREKTRKDPNSEKPGEIYVPRDENFGHLKSSDFLTYGIKSLSQNVIPLFKSIILNLRVTSSEFDSFDEVRGLFEGGIKLPTNILSQISPLPVLKEIFRTDGENTLQFPPPHVIRVSKSGWMTDDEFAREMIAGVNPNVIRRLQEFPPKSTLDP…	100	0	NP_001235189.1	lipoxygenase [Glycine max]	86	0	sp|P24095|LOXX_SOYBN	Seed linoleate 9S-lipoxygenase OS=Glycine max GN=LOX1.4 PE=1 SV=1	-	-	-	-	-	-	-	K15718|1|0.0|1769|gmx:547856|linoleate 9S-lipoxygenase [EC:1.13.11.58]	GO:0031408//oxylipin biosynthetic process	GO:0046872//metal ion binding;GO:0016702//oxidoreductase activity, acting on single donors with incorporation of molecular oxygen, incorporation of two atoms of oxygen	GO:0005737//cytoplasm
379	XP_003528976.1	dihydropyrimidine dehydrogenase (NADP(+)), chloroplastic [Glycine max]	0.79	46554.3	0.108	4	4	NP_001239758.1	0.108	9	0.0012	XP_003528976.1	MASLSMIQIRTGNCASGFGLNCAGKVKVGPSRVGFKVFASETQATEPDLSVTVNGLRMPNPFVIGSGPPGTNYTVMKRAFDEGWGAVIAKTVSLDAAKVINVTPRYARLRAGANGSAKGEIIGWENIELISDRPLETMLKEFKQLKEEYPDRILIASIMEEYNKAAWEELIDRVEQTGVDAFEINFSCPHGMPERKMGAAVGQDCALLEEVCGWINAKATIPVWAKMTPNITDISQPARIALSSGCEGVSAINTIMSVMGINLNTLRPEPCVEGYSTPGGYSARAVHPIALGKVMSIAKMMKSEFDSENYTLSAIGGVETGGDAAEFILLGANTVQVCTGVMMHGYGLVKKLCLELQDFMKKHNFTSIEDFRGVSLEYFTTHTDLVRRQKEAVQKRKAI…	100	0	XP_003528976.1	PREDICTED: dihydropyrimidine dehydrogenase (NADP(+)), chloroplastic [Glycine max]	83.29	0	sp|Q9LVI9|DPYD_ARATH	Dihydropyrimidine dehydrogenase (NADP(+)), chloroplastic OS=Arabidopsis thaliana GN=PYD1 PE=1 SV=1	At3g17810	706	0	KOG1799	Dihydropyrimidine dehydrogenase	F	Nucleotide transport and metabolism	K00207|1|0.0|880|gmx:100818990|dihydropyrimidine dehydrogenase (NADP+) [EC:1.3.1.2]		GO:0016627//oxidoreductase activity, acting on the CH-CH group of donors	GO:0005737//cytoplasm
33	NP_001235936.2	superoxide dismutase [Glycine max]	0.78	15322.6	0.197	3	80	-	0.106	9	0.000524	NP_001235936.2	MVKAVAVLGSSEGVTGTIHFVQEGSGPTTVTGSLAGLKPGLHGFHVHALGDTTNGCLSTGSHFNPNNKEHGAPEDENRHAGDLGNVNVGDDGTVSFTITDSQIPLTGPNNIIGRAVVVHADPDDLGKGGHELSKTTGNAGGRVACGIIGLQG	100	4e-104	KHN04039.1	Superoxide dismutase [Cu-Zn] [Glycine soja]	94.74	2e-100	sp|Q7M1R5|SODC_SOYBN	Superoxide dismutase [Cu-Zn] OS=Glycine max GN=SOD1 PE=3 SV=1	At1g08830	254	6e-88	KOG0441	Cu2+/Zn2+ superoxide dismutase SOD1	P	Inorganic ion transport and metabolism	K04565|1|8e-105|300|gmx:100305732|superoxide dismutase, Cu-Zn family [EC:1.15.1.1]		GO:0046872//metal ion binding;GO:0008270//zinc ion binding;GO:0004784//superoxide dismutase activity;GO:0005507//copper ion binding	GO:0005737//cytoplasm;GO:0005615//extracellular space
102	XP_003531110.3	1-Cys peroxiredoxin [Glycine max]	0.78	24523.7	0.046	1	1	-	0.113	9	0.0005866	XP_003531110.3	MPGLTIGDTIPDLQVETNQGKIKLHQFCADGWTILFSHPGDFTPVCTTELGKMAQYAKEFYQRGVKLLGLSCDDVQSHNEWIKDIEAYTPGAKVNYPIIADPKREIIKQLNMVDPDEKDSTGNLPSRALHIVGPDLKIKLSFLYPATTGRNMDEVLRVIESLQKASKFKVATPANWKPGDPVVITPDVTNEQAKEMFPQGFESVKLPSKKEYLRLTKV	100	2e-162	XP_003531110.3	PREDICTED: 1-Cys peroxiredoxin [Glycine max]	85.78	5e-145	sp|Q6E2Z6|REHY_MEDTR	1-Cys peroxiredoxin OS=Medicago truncatula PE=2 SV=1	At1g48130	325	6e-114	KOG0854	Alkyl hydroperoxide reductase, thiol specific antioxidant and related enzymes	O	Posttranslational modification, protein turnover, chaperones	K11188|1|3e-163|452|gmx:100820616|peroxiredoxin 6, 1-Cys peroxiredoxin [EC:1.11.1.7 1.11.1.15 3.1.1.-]	GO:0045454//cell redox homeostasis	GO:0051920//peroxiredoxin activity	GO:0005623//cell
372	NP_001241357.1	phosphoenolpyruvate carboxylase isoform X1 [Glycine max]	0.78	111129	0.016	1	1	NP_001236741.2	0.089	9	0.0002102	NP_001241357.1	MATRNLEKMASIDAQLRQLAPAKVSEDDKLIEYDALLLDRFLDILQDLHGEDLKETVQEVYELSAEYEGKHDPKKLEELGNLITSLDAGDSILVAKSFSHMLNLANLAEEVQISRRRRNKLKKGDFADENNATTESDIEETLKKLVFDLKKSPQEVFDALKNQTVDLVLTAHPTQSIRRSLLQKHGRIRNCLSQLYAKDITPDDKQELDEALQREIQAAFRTDEIRRTPPTPQDEMRAGMSYFHETIWNGVPRFLRRVDTALNNIGIKERVPYNAPLIQFSSWMGGDRDGNPRVTPEVTRDVCLLARMMAANLYYSQIEDLMFELSMWRCNDELRVRAEELHRSSKKDEVAKHYIEFWKKVPPNEPYRVVLGEVRDRLYQTRERSRHLLSNGYSDIPEE…	100	0	NP_001241357.1	phosphoenolpyruvate carboxylase [Glycine max]	100	0	sp|P51061|CAPP2_SOYBN	Phosphoenolpyruvate carboxylase OS=Glycine max GN=PPC1 PE=2 SV=1	-	-	-	-	-	-	-	K01595|1|0.0|2000|gmx:100805069|phosphoenolpyruvate carboxylase [EC:4.1.1.31]	GO:0048366//leaf development;GO:0006099//tricarboxylic acid cycle;GO:0015977//carbon fixation;GO:0015979//photosynthesis	GO:0008964//phosphoenolpyruvate carboxylase activity	GO:0005829//cytosol;GO:0048046//apoplast;GO:0009507//chloroplast
380	XP_003520940.1	frataxin, mitochondrial [Glycine max]	0.78	21874.2	0.058	1	1	XP_003554058.1	0.13	9	0.001347	XP_003520940.1	MASKLLLQRRLFRFLQLSPPFFSSIHAAPTILSAKASEFMFLYNVNALLPPLSPSRNFCSRSFNLHESQGPLTIDYSSLLQEGEFHRLADSTIHSLQEKLEDYGDSVEVDGFDIDYGNDVLTIKLGDLGTYVLNKQTPNRQLWLSSPMSGPSRFDWDRDTKAWIYRRNKANLYKILEGELEQLCGKPIVLS	100	5e-140	XP_003520940.1	PREDICTED: frataxin, mitochondrial-like [Glycine max]	56.77	1e-65	sp|Q9ZR07|FRDA_ARATH	Frataxin, mitochondrial OS=Arabidopsis thaliana GN=FH PE=1 SV=2	At4g03240	169	9e-54	KOG3413	Mitochondrial matrix protein frataxin, involved in Fe/S protein biosynthesis	P	Inorganic ion transport and metabolism	K19054|1|1e-140|393|gmx:100811801|frataxin [EC:1.16.3.1]	GO:0006879//cellular iron ion homeostasis;GO:0018283//iron incorporation into metallo-sulfur cluster;GO:0016226//iron-sulfur cluster assembly;GO:0034599//cellular response to oxidative stress;GO:0007005//mitochondrion organization	GO:0004322//ferroxidase activity;GO:0051537//2 iron, 2 sulfur cluster binding;GO:0008198//ferrous iron binding;GO:0008199//ferric iron binding;GO:0034986//iron chaperone activity	GO:0005739//mitochondrion
172	XP_003531426.1	thioredoxin-like protein Clot [Glycine max]	0.77	15204.9	0.061	1	1	NP_001239644.1	0.166	9	0.005196	XP_003531426.1	MTLKVLDATVSSFDGVFEKFRSEAPKNKANLILFLADKDPSTSLSWCPDCVRAEPVIYKKLEASSDEISLLRAYVGDRPTWRNPQHPWRVQPRFKLTGVPTLIRWENDTVKARLEDHEAHIENKIEALVADK	100	6e-94	XP_003531426.1	PREDICTED: thioredoxin-like protein Clot [Glycine max]	63.33	3e-54	sp|Q9FMN4|TCLOT_ARATH	Thioredoxin-like protein Clot OS=Arabidopsis thaliana GN=At5g42850 PE=2 SV=1	At5g42850	166	5e-54	KOG3425	Uncharacterized conserved protein	S	Function unknown	-		GO:0047134//protein-disulfide reductase activity	GO:0005829//cytosol
282	XP_003526464.3	oleosin 1 [Glycine max]	0.77	17516	0.036	1	1	XP_014626028.1;XP_014621926.1;XP_025982495.1;XP_014620586.1;XP_014620584.1;XP_025980433.1;XP_014620585.1;XP_014620583.1;XP_006592614.1;XP_006582117.1;XP_003519558.1;NP_001237942.2	0.348	9	0.04972	XP_003526464.3	MATISTDQPRGSYSYGTSYGAPYGTTYETNSSINNPPSRQTVKFITAATIGITLLLLSGLTLTGTVIGLIIATPLLVIFSPILVPAAFVLFLVASGFLFSGGCGVAAIAALSWIYNYVSGNQPAGSDTLDYAKGYLTDKARDVKERAKDYGSYAQGRINEATQGTY	100	2e-116	KRH52626.1	hypothetical protein GLYMA_06G078700 [Glycine max]	53.12	6e-37	sp|Q42980|OLEO1_ORYSJ	Oleosin 16 kDa OS=Oryza sativa subsp. japonica GN=OLE16 PE=2 SV=3	-	-	-	-	-	-	-	-			GO:0016021//integral component of membrane;GO:0012511//monolayer-surrounded lipid storage body
486	XP_003542149.1	mitochondrial import inner membrane translocase subunit Tim13 [Glycine max]	0.77	9538.62	0.116	1	2	XP_003532348.1	0.251	9	0.02127	XP_003542149.1	MDSFSNPSSGSSHQLSAHDLKNQLKNQLAIEYAQQFLETVGRKCFEKCVTKPGSSLGGSESSCISRCVDRYIEATGIISKALFSSQ	100	2e-57	XP_003542149.1	PREDICTED: mitochondrial import inner membrane translocase subunit Tim13 [Glycine max]	81.82	1e-27	sp|Q9XGY5|TIM13_ORYSJ	Mitochondrial import inner membrane translocase subunit Tim13 OS=Oryza sativa subsp. japonica GN=TIM13 PE=3 SV=2	At1g61570	87	7e-24	KOG1733	Mitochondrial import inner membrane translocase, subunit TIM13	U	Intracellular trafficking, secretion, and vesicular transport	K17781|1|3e-58|176|gmx:100500530|mitochondrial import inner membrane translocase subunit TIM13	GO:0045039//protein import into mitochondrial inner membrane;GO:0015031//protein transport;GO:0072321//chaperone-mediated protein transport	GO:0008565//protein transporter activity;GO:0046872//metal ion binding	GO:0042719//mitochondrial intermembrane space protein transporter complex;GO:0005739//mitochondrion
402	XP_003543938.1	alpha-1,4 glucan phosphorylase L isozyme, chloroplastic/amyloplastic [Glycine max]	0.76	110522	0.079	5	7	-	0.154	9	0.003474	XP_003543938.1	MASSATMRFSATSTGAEAALPRRNSVAGFIGVAARSSAKSRLRFIGRNANLSLRRRMSSFPVVKCVSGSEAKAQDPVAKQQEATTSLSSFSPDASSIASSIKYHAEFTPLFSPENFDLPQAFLATAQSVRDALIINWNATYDYYEKLNVKQAYYLSMEFLQGRALLNAIGNLELTGPHAEALSKLGHKLENVAYQEPDAALGNGGLGRLASCFLDSLATLNYPAWGYGLRYKYGLFKQRITKDGQEEVADDWLEMGNPWEIIRNDVSYPVKFYGKVVSGSDGKKHWIGGEDIKAVAHDVPIPGYKTKTTINLRLWSTKAASEEFDLSAFNAGRHTEASEALANAEKICYILYPGDESIEGKILRLKQQYTLCSASLQDIIARFERRSGTNVNWEEFPEK…	100	0	XP_003543938.1	PREDICTED: alpha-1,4 glucan phosphorylase L isozyme, chloroplastic/amyloplastic [Glycine max]	84.18	0	sp|P53536|PHSL_VICFA	Alpha-1,4 glucan phosphorylase L isozyme, chloroplastic/amyloplastic OS=Vicia faba GN=PHO1 PE=2 SV=2	At3g29320	1528	0	KOG2099	Glycogen phosphorylase	G	Carbohydrate transport and metabolism	K00688|1|0.0|2027|gmx:100800659|glycogen phosphorylase [EC:2.4.1.1]	GO:0005975//carbohydrate metabolic process;GO:0005980//glycogen catabolic process	GO:0102250//linear malto-oligosaccharide phosphorylase activity;GO:0030170//pyridoxal phosphate binding;GO:0008184//glycogen phosphorylase activity;GO:0102499//SHG alpha-glucan phosphorylase activity	GO:0005737//cytoplasm
461	XP_003543443.1	probable histone H2B.3 [Glycine max]	0.76	14656.1	0.083	1	1	XP_003540207.1;NP_001346041.1;NP_001235921.1;NP_001236239.1;XP_003521344.1;XP_003542467.1;XP_003538012.1;NP_001237892.1;XP_003539696.1;XP_003539691.2	0.213	9	0.01328	XP_003543443.1	MAKAAEKKPAAEKSPAEKKPKAEKKIPKEGGGEKKKKRSKKSVETYKIYIFKVLKQVHPDIGISSKAMGIMNSFINDIFEKLAQEAARLARYNKKPTITSREIQTAVRLVLPGELAKHAVSEGTKAVTKFTSS	100	1e-89	XP_003543443.1	PREDICTED: probable histone H2B.3 [Glycine max]	88.65	6e-75	sp|Q1S9I9|H2B1_MEDTR	Probable histone H2B.1 OS=Medicago truncatula PE=3 SV=3	At5g59910	216	3e-73	KOG1744	Histone H2B	B	Chromatin structure and dynamics	K11252|1|2e-90|261|gmx:100793796|histone H2B		GO:0003677//DNA binding;GO:0046982//protein heterodimerization activity	GO:0005634//nucleus;GO:0000786//nucleosome
73	XP_003526742.1	probable 6-phosphogluconolactonase 4, chloroplastic [Glycine max]	0.75	27821.5	0.035	1	1	XP_003523335.1;XP_006596296.1	0.147	9	0.001585	XP_003526742.1	MAETNNNVAVEVLEKEDLAVSLAKYVADLSNKFTSERGAFTVCLSGGSLINYLRKLLEPPYVDTLEWSKWHVFWVDERVVPKTHEDSNYKLALDGLLSKVPIPPGNVYAINDALSAEGAANDYETCLRHLVKNSIIASSPANGFPKFDLMLLGMGPDGHIASLFPGHPLVEEKQRWVTFIKDSPKPPPERITFTLPVINTSAYAALVVTGKGKADAVHSVLGKSQNFAKLPVGLVSPEGELKWFLDKGAASKLAA	100	0	XP_003526742.1	PREDICTED: probable 6-phosphogluconolactonase 4, chloroplastic [Glycine max]	73.03	3e-127	sp|A2Z3C4|6PGL4_ORYSI	Probable 6-phosphogluconolactonase 4, chloroplastic OS=Oryza sativa subsp. indica GN=OsI_031067 PE=3 SV=2	At5g24400	342	1e-119	KOG3147	6-phosphogluconolactonase - like protein	G	Carbohydrate transport and metabolism	K01057|1|0.0|519|gmx:100792737|6-phosphogluconolactonase [EC:3.1.1.31]	GO:0005975//carbohydrate metabolic process;GO:0006098//pentose-phosphate shunt;GO:0009051//pentose-phosphate shunt, oxidative branch	GO:0017057//6-phosphogluconolactonase activity;GO:0016853//isomerase activity	GO:0005737//cytoplasm
257	XP_003519681.1	mitochondrial import inner membrane translocase subunit TIM10 [Glycine max]	0.75	9895.61	0.202	2	3	XP_003547167.1	0.197	9	0.006489	XP_003519681.1	MASNISPSAFDKEQIFGMAEKEMEYRVELFNKMTQTCFNKCVDNRYKESELNMGENSCIDRCVSKYWHVTNLIGQLLGSGRPPM	100	1e-58	XP_003519681.1	PREDICTED: mitochondrial import inner membrane translocase subunit TIM10 [Glycine max]	72.62	7e-43	sp|Q9ZW33|TIM10_ARATH	Mitochondrial import inner membrane translocase subunit TIM10 OS=Arabidopsis thaliana GN=TIM10 PE=1 SV=1	At2g29530	134	1e-42	KOG3480	Mitochondrial import inner membrane translocase, subunits TIM10/TIM12	U	Intracellular trafficking, secretion, and vesicular transport	K17778|1|2e-59|179|gmx:100500290|mitochondrial import inner membrane translocase subunit TIM10	GO:0045039//protein import into mitochondrial inner membrane;GO:0015031//protein transport	GO:0008565//protein transporter activity;GO:0046872//metal ion binding	GO:0005739//mitochondrion;GO:0005743//mitochondrial inner membrane
445	XP_003554323.1	hypersensitive-induced response protein 2-like isoform X1 [Glycine max]	0.73	31797.1	0.098	2	2	NP_001236736.2;NP_001276205.1	0.07	9	6.349e-06	XP_003554323.1	MGQAFGCYQVDQSNVAIKEHFGKFDDVLEPGCHCLPWCLGYQIAGSLSLRVQQLDVRCETKTKDNVFVNVVASVQYRAVSEKASDAFYRLTNTREQIQSYVFDVIRASVPKLELDSVFEQKNDIAKAVEEELEKAMSTYGFEIVQTLIVDIEPDVNVKRAMNEINAAARLRLAANEKAEAEKILQIKKAEGEAESKYLSGLGIARQRQAIVDGLRDSVLAFSENVPGTSAKDVMDMVLVTQYFDTMKEIGASSRSSSVFIPHGPGAVKDIAVQIRDGLLQATASQN	100	0	XP_003554323.1	PREDICTED: hypersensitive-induced response protein 2-like isoform X1 [Glycine max]	89.32	0	sp|Q6ZIV7|HIR1_ORYSJ	Hypersensitive-induced response protein 1 OS=Oryza sativa subsp. japonica GN=HIR1 PE=1 SV=1	At5g62740	506	0	KOG2620	Prohibitins and stomatins of the PID superfamily	C	Energy production and conversion	-	-	-	-	-
361	NP_001242699.1	uncharacterized protein LOC100802762 [Glycine max]	0.72	27554	0.056	1	1	NP_001240977.1;XP_025984782.1;XP_006590329.1	0.113	9	0.0002701	NP_001242699.1	MTVSSENCVSSQSSLTRLAPLEAVLFDIDGTLCDSDPLHYYAFREMLLEIGFNEGVPITEEFFIETVAGKHNDDIASVLFPGDLERGLKFVDDKEAMFRRLAAEQVRPLNGLDKVRKWIENHGLKRAAVTNAPRANAELMISILGLSDFFDAVIIGGECERAKPHPDPYLKGLEALKASKDHTFVFEDSVSGIKAGVAAGMPVIGIATRNPENLLMEAKPAFLIKDYEDPKLWAALEELDKAGAFSLNY	100	0	NP_001242699.1	uncharacterized protein LOC100802762 [Glycine max]	69.2	1e-123	sp|Q9ZVJ5|SGGP_ARATH	Haloacid dehalogenase-like hydrolase domain-containing protein Sgpp OS=Arabidopsis thaliana GN=SGPP PE=1 SV=2	At2g38740	292	2e-100	KOG2914	Predicted haloacid-halidohydrolase and related hydrolases	R	General function prediction only	K20884|1|9e-16|80.1|sita:101770429|riboflavin kinase / FMN hydrolase [EC:2.7.1.26 3.1.3.102]	GO:0008152//metabolic process	GO:0016787//hydrolase activity	-
497	XP_003555839.1	probable prefoldin subunit 5 [Glycine max]	0.72	16900.8	0.077	1	4	-	0.095	9	7.233e-05	XP_003555839.1	MAASGSWKSGSGSSMGLERMSVEQLKAVKEQADLEVNLLQDSLSNIRTATTRLEIASSALNDLSLRPQGNHILVPLTASLYVPATLHDSQHVLVDVGTGYFIEKTMPEGKDYCDRKINLLKSNFDQLVEVASKKKNVADEAGVILQAKLKQLASSS	100	3e-111	XP_003555839.1	PREDICTED: probable prefoldin subunit 5 [Glycine max]	73.65	5e-76	sp|P57742|PFD5_ARATH	Probable prefoldin subunit 5 OS=Arabidopsis thaliana GN=At5g23290 PE=2 SV=1	At5g23290	223	1e-75	KOG3048	Molecular chaperone Prefoldin, subunit 5	O	Posttranslational modification, protein turnover, chaperones	K04797|1|5e-112|318|gmx:100784222|prefoldin alpha subunit	GO:0006457//protein folding;GO:0006355//regulation of transcription, DNA-templated	GO:0051082//unfolded protein binding	GO:0005737//cytoplasm;GO:0005829//cytosol;GO:0016272//prefoldin complex
305	XP_003538225.2	subtilisin inhibitor CLSI-I [Glycine max]	0.71	13362.8	0.067	1	21	-	0.258	9	0.008329	XP_003538225.2	MLQKTFIKGSFVEYSIVRYFIMAEEKQGQGTNPPQEQPNEPLPRDYNQLLGTNNPTKTSWPELVGVTAEEAEKKIKEEMGGAEIQVVPPGYFVTADFKPKRVRLYVDESNKVTRAPGIG	100	1e-82	XP_003538225.2	PREDICTED: subtilisin inhibitor CLSI-I-like [Glycine max]	75.27	1e-43	sp|P16064|ICI1_PHAAN	Subtilisin inhibitor 1 OS=Phaseolus angularis PE=1 SV=1	-	-	-	-	-	-	-	-	GO:0009611//response to wounding	GO:0004867//serine-type endopeptidase inhibitor activity	-
328	NP_001237169.1	seed maturation protein PM41 [Glycine max]	0.71	8211.97	0.205	2	23	-	0.319	9	0.01644	NP_001237169.1	MSGAQGAQPKESKTATTYESVEGGENRTRTDLLSREDQGCIQVEKLQEKVHDPAGKGGPVFGAGKDEDKQDLGVTGTG	100	5e-50	NP_001237169.1	seed maturation protein PM41 [Glycine max]	-	-	-	-	-	-	-	-	-	-	-	-	-	-	-
92	XP_003522597.1	DNA mismatch repair protein MLH1 [Glycine max]	0.7	82357.5	0.048	1	1	-	0.22	9	0.006217	XP_003522597.1	MEESENQRRMEPPKIQRLSESVVNRIAAGEVIQRPVSAVKELVENSLDAASSSVSLLIKDGGLKLIQVSDDGHGIRFEDLPILCERHTTSKLSSFEDLQRIKSMGFRGEALASMTYVAHVTVTTITKPQLHGYRVSYRDGVMEHQPRPCAAVKGTQIMVENLFYNMAARRKTLQNSSDDYSKIVDLVSRFAIHHINVSFSCRKHGAVRADVHTVAMSSRLDAIKSVYGVSVARNLIEIEASDNDPSTSVFEMHGYMSNANYAAKKITMVLFINDRLVECSALKRAIEIVYAATLPKASKPFIYISIVLPPENIDVNVHPTKREVSLLNQEVIIEKIQSVVESTLRSSNEARTFQEQSAGQSSSPRINTSKEVNLSPMPTGSRLLKVPVHKLVRTDSLDP…	100	0	XP_003522597.1	PREDICTED: DNA mismatch repair protein MLH1 [Glycine max]	71.83	0	sp|Q9ZRV4|MLH1_ARATH	DNA mismatch repair protein MLH1 OS=Arabidopsis thaliana GN=MLH1 PE=2 SV=1	At4g09140	1066	0	KOG1979	DNA mismatch repair protein - MLH1 family	L	Replication, recombination and repair	K08734|1|0.0|1513|gmx:100794788|DNA mismatch repair protein MLH1	GO:0006298//mismatch repair	GO:0016887//ATPase activity;GO:0030983//mismatched DNA binding;GO:0003697//single-stranded DNA binding;GO:0005524//ATP binding	GO:0032389//MutLalpha complex;GO:0005712//chiasma;GO:0032300//mismatch repair complex;GO:0000795//synaptonemal complex
141	XP_006600683.1	delta-1-pyrroline-5-carboxylate dehydrogenase 12A1, mitochondrial isoform X3 [Glycine max]	0.7	50381	0.047	2	2	XP_014625478.1;XP_003549664.1;XP_003524922.1;XP_006579542.1	0.093	9	4.534e-05	XP_006600683.1	MVHTILLRHQRDISCLERYLLRQLTCYHFLRLIQRVSPKSYQQAFGEVYVTQKFLENFCGDQVRFLARSFAVPGNHLGQQSHGFRWPYGPVAIITPFNFPLEIPVLQLMGALYMGNKPVLKVDSKVSIVMEQMLRLLHTCGLPLEDVDFINSDGKTMNKLLLEGNPRMTLFTGSSRVAEKLAVDLKGRVKLEDAGFDWKILGPDVHQEDYVAWVCDQDAYACSGQKCSAQSLLFMHENWSKTSLLSKLKDLAERRKLADLTIGPVLTVTTDSMLEHVNKLLEIPGSKLLFGGSPLENHSIPPIYGAIKPTAVYVPLEEIMKDKNFELVTKEIFGPFQVITDYQNSQLAVVLDALERMHNHLTAAVVSNDPLFLQEVIGKSVNGTTYAGLRARTTGAPQN…	100	0	XP_006600683.1	PREDICTED: delta-1-pyrroline-5-carboxylate dehydrogenase 12A1, mitochondrial-like isoform X3 [Glycine max]	84.69	0	sp|Q40255|ALDH_LINUS	Probable aldehyde dehydrogenase OS=Linum usitatissimum GN=FIS1 PE=2 SV=1	At5g62530	762	0	KOG2451	Aldehyde dehydrogenase	C	Energy production and conversion	K00294|1|0.0|870|gmx:100806579|1-pyrroline-5-carboxylate dehydrogenase [EC:1.2.1.88]		GO:0016491//oxidoreductase activity	-
16	XP_003529967.1	ubiquitin carboxyl-terminal hydrolase 6 isoform X2 [Glycine max]	0.68	54583.5	0.017	1	1	XP_006583027.1	0.115	9	0.0001135	XP_003529967.1	MITVSVRWQKEIFKDVELDTTQSPYVFKCQLYDLTGVPPERQKIMVKGGLLKDDADWSTVGVKEGQKLMMMGTADEVVKTPEKGTVFVEDLPEEEQVVAVGHTAGLFNLGNTCYMNSTLQCLHSVPELKSALTNYSHSGRNNDVDQSSHLLTIATRDLFSELDKSVKPVAPMQFWMVLRKKYPQFGQLHNGVFMQQDAEECWTQLLYTLSQSLRSPGSSENPDAVKALFGIELISRIHCQESKEESSEAESVYSLKCHISQEVNHLHEGIKHGLKSELEKASLVLGRSAIHLKESRINALPRYLTVQFVRFFWKRESNQKAKILRKVDYPLELDVYDFCSDELRKKLEAPRQILRNEEGKKLGLKVNEKSSVQKENDVKMSDAEGATSGGGEPSVVPME…	100	0	XP_003529967.1	PREDICTED: ubiquitin carboxyl-terminal hydrolase 6-like isoform X2 [Glycine max]	74.74	0	sp|Q949Y0|UBP6_ARATH	Ubiquitin carboxyl-terminal hydrolase 6 OS=Arabidopsis thaliana GN=UBP6 PE=1 SV=1	At3g21280	730	0	KOG1872	Ubiquitin-specific protease	O	Posttranslational modification, protein turnover, chaperones	K11843|1|0.0|998|gmx:100802120|ubiquitin carboxyl-terminal hydrolase 14 [EC:3.4.19.12]	GO:0006511//ubiquitin-dependent protein catabolic process;GO:0016579//protein deubiquitination	GO:0036459//thiol-dependent ubiquitinyl hydrolase activity	GO:0005634//nucleus
30	XP_003521095.1	alpha-L-arabinofuranosidase 1 [Glycine max]	0.68	74340.1	0.019	1	1	-	0.247	9	0.004823	XP_003521095.1	MGSSKALCSVSLLHLFILVCLVFQCFATKKHADLTTTLTVNASDASGKPIPETLFGIFFEEINHAGAGGLWAELVSNRGFEAGGPNTPSNIDPWSIIGNESLINIETDRTSCFDRNKVALRLEVLCDSKGDNICPADGVGVYNPGFWGMNIEQGKKYKVVFYVRSTESLNLTVSLTGSNGVGNLASSVITGSALDFSNWTKVEKILVAKATDHNSRLQLTTTTKGVIWLDQVSAMPLDTYKGHGFRTDLVEMLTALKPRFIRFPGGCFVEGEWLRNAFRWKASVGPWEERPGHFGDVWMYWTDDGLGYYEFLQLAEDLGTAPIWVFNNGVSHNDQVDTSAVLPLVQEALDGLEFARGDRTSKWGSLRAAMGHPAPFDLRYVAVGNEDCGKKNYRGNYLK…	100	0	XP_003521095.1	PREDICTED: alpha-L-arabinofuranosidase 1 [Glycine max]	68.79	0	sp|Q9SG80|ASD1_ARATH	Alpha-L-arabinofuranosidase 1 OS=Arabidopsis thaliana GN=ASD1 PE=1 SV=1	-	-	-	-	-	-	-	K01209|1|0.0|1397|gmx:100806458|alpha-N-arabinofuranosidase [EC:3.2.1.55]	GO:0046373//L-arabinose metabolic process	GO:0046556//alpha-L-arabinofuranosidase activity	GO:0009505//plant-type cell wall
124	NP_001238008.1	glycinin G4 precursor [Glycine max]	0.68	64196.6	0.03	1	1	-	0.15	9	0.0005954	NP_001238008.1	MGKPFTLSLSSLCLLLLSSACFAISSSKLNECQLNNLNALEPDHRVESEGGLIQTWNSQHPELKCAGVTVSKLTLNRNGLHLPSYSPYPRMIIIAQGKGALGVAIPGCPETFEEPQEQSNRRGSRSQKQQLQDSHQKIRHFNEGDVLVIPPGVPYWTYNTGDEPVVAISLLDTSNFNNQLDQTPRVFYLAGNPDIEYPETMQQQQQQKSHGGRKQGQHQQEEEEEGGSVLSGFSKHFLAQSFNTNEDIAEKLQSPDDERKQIVTVEGGLSVISPKWQEQQDEDEDEDEDDEDEQIPSHPPRRPSHGKREQDEDEDEDEDKPRPSRPSQGKREQDQDQDEDEDEDEDQPRKSREWRSKKTQPRRPRQEEPRERGCETRNGVEENICTLKLHENIARPSRA…	100	0	NP_001238008.1	glycinin G4 precursor [Glycine max]	98.58	0	sp|P02858|GLYG4_SOYBN	Glycinin G4 OS=Glycine max GN=GY4 PE=1 SV=1	-	-	-	-	-	-	-	K01569|1|1e-20|97.8|smo:SELMODRAFT_83729|oxalate decarboxylase [EC:4.1.1.2]		GO:0045735//nutrient reservoir activity	-
429	XP_014625942.1	histone H4, partial [Glycine max]	0.68	11068.2	0.22	2	2	NP_001237495.1;XP_025982182.1;XP_006604532.1	0.213	9	0.005339	XP_014625942.1	GGKVARGLGKGGAKRHRKVLRDNIQGISKPAIRKIARRGGVKRISGLIYEETRGVQKNFLENVIRDAVTYTEHARRKTVTAMDVVYALKRQGRTLYGFGG	100	9e-65	XP_014625942.1	PREDICTED: histone H4-like, partial [Glycine max]	93.02	4e-54	sp|P08436|H4_VOLCA	Histone H4 OS=Volvox carteri GN=H4-I PE=3 SV=2	At5g59970	163	1e-53	KOG3467	Histone H4	B	Chromatin structure and dynamics	K11254|1|2e-65|196|gmx:100776133|histone H4	GO:0006334//nucleosome assembly	GO:0003677//DNA binding;GO:0046982//protein heterodimerization activity	GO:0005634//nucleus;GO:0000786//nucleosome
8	NP_001347984.1	glyceraldehyde-3-phosphate dehydrogenase [Glycine max]	0.65	36914.2	0.166	1	3	NP_001347085.1	0.177	9	0.0008088	NP_001347984.1	MGKVKIGINGFGRIGRLVARVALQRDDVELVAVNDPFITTDYMTYMFKYDSVHGHWKHHDVTVKDEKTLLFGDKPVTVFGHRNPEEIPWKSTGADIIVESTGVFTDKDKAAAHLKGGAKKVIISAPSKDAPMFVVGVNEHEYKPELDIISNASCTTNCLAPLAKVINDRFGIVEGLMTTVHSITATQKTVDGPSAKDWRGGRAASFNIIPSSTGAAKAVGKVLPALNGKLTGMAFRVPTVDVSVVDLTVRLEKEASYDEIKNAIKEESEGKLKGILGYTEDDVVSTDFVGDSRSSIFDAKAGIALNKNFVKLVSWYDNEWGYSSRVIDLLVFVAKKSF	100	0	XP_003523131.1	PREDICTED: glyceraldehyde-3-phosphate dehydrogenase, cytosolic [Glycine max]	89.02	0	sp|P34783|G3P_ATRNU	Glyceraldehyde-3-phosphate dehydrogenase OS=Atriplex nummularia PE=2 SV=1	At3g04120	618	0	KOG0657	Glyceraldehyde 3-phosphate dehydrogenase	G	Carbohydrate transport and metabolism	K00134|1|0.0|687|gmx:547514|glyceraldehyde 3-phosphate dehydrogenase [EC:1.2.1.12]	GO:0006006//glucose metabolic process	GO:0051287//NAD binding;GO:0016620//oxidoreductase activity, acting on the aldehyde or oxo group of donors, NAD or NADP as acceptor;GO:0050661//NADP binding	-
156	NP_001340170.1	alcohol dehydrogenase family protein [Glycine max]	0.6	41619.8	0.071	2	4	XP_003526673.1	0.177	9	0.0005847	NP_001340170.1	MSSTAGQVIKCKAAVSWEAGKPLVIEEVEVAPPQAGEVRLKILYTSLCHTDVYFWEAKGQTPLFPRIFGHEAGGIVESVGEGVTHLKPGDHALPVFTGECGDCPHCKSEESNMCDLLRINTDRGVMIHDSQTRFSIKGQPIYHFVGTSTFSEYTVVHAGCVAKVNPAAPLDKICVLSCGICTGLGATINVAKPKPGSSVAIFGLGAVGLAAAEGARISGASRIIGVDLVSSRFEEAKKFGVNEFVNPKDHDKPVQEVIAAMTNGGVDRAVECTGSIQAMISAFECVHDGWGVAVLVGVPNKDDAFKTHPVNFLNERTLKGTFYGNYKPRTDLPSVVEKYMNGELELEKFITHTVPFSEINKAFDYMLKGESIRCIIRMGE	100	0	NP_001340170.1	alcohol dehydrogenase family protein [Glycine max]	92.63	0	sp|P12886|ADH1_PEA	Alcohol dehydrogenase 1 OS=Pisum sativum PE=1 SV=1	At1g77120	677	0	KOG0022	Alcohol dehydrogenase, class III	Q	Secondary metabolites biosynthesis, transport and catabolism	K18857|1|0.0|784|gmx:100783858|alcohol dehydrogenase class-P [EC:1.1.1.1]		GO:0008270//zinc ion binding;GO:0016491//oxidoreductase activity	-
103	XP_006581893.1	protein STICHEL-like 2 [Glycine max]	3.46	109239	0.011	1	1	-	2.323	9	0.02812	XP_006581893.1	MMDGRRHSVDIPISKTLVALRRVRSLRDPTTNSMSKLSSLVDNVHWENGSGNEISLRFSDAAGPCDSDDNAAFRSRNLGFKGHRKPDDADFLLNHGLLNSRLKPSGMMSCKDDQQDDEMVHSKPNLQCISGDKSPSESCGSNLGGKGLDLSCIVLPSNNFKDGDSCYIETARSSQLGRTDYSKSAKKSLRKNQVKPSEVAISIASNEGSPCPSGYDAFSPYSAKVGINQDVDVLDNNDDGCGISCCWSKSPRFRESNLYGEIEDRPLISHRVDETDLDAHRSMRHNGGGISPTLETPRSLSMKFRPKSFSDLVGQNVVVRSLLAAISRGRITSFYLFYGPRGTGKTSTSRMFAAALNCLSVVEKRPCGLCRECVLLFSGRNKDVKEVDSVTINRAEQVK…	100	0	XP_006581893.1	PREDICTED: protein STICHEL-like 2 [Glycine max]	45.24	0	sp|F4JRP8|STIL2_ARATH	Protein STICHEL-like 2 OS=Arabidopsis thaliana GN=At4g24790 PE=3 SV=1	At4g24790	652	0	KOG0989	Replication factor C, subunit RFC4	L	Replication, recombination and repair	K10755|1|9e-18|90.5|ota:OT_ostta09g00990|replication factor C subunit 2/4!K10756|3|3e-16|85.9|gsl:Gasu_59480|replication factor C subunit 3/5	GO:0006281//DNA repair;GO:0006260//DNA replication;GO:0006261//DNA-dependent DNA replication	GO:0003887//DNA-directed DNA polymerase activity;GO:0003677//DNA binding;GO:0005524//ATP binding	GO:0005634//nucleus;GO:0005663//DNA replication factor C complex;GO:0009360//DNA polymerase III complex
72	XP_025981111.1	probable ATP synthase 24 kDa subunit, mitochondrial [Glycine max]	2.55	20383.1	0.062	1	2	XP_003531386.1;XP_003525085.1	1.012	9	0.0005202	XP_025981111.1	MLKNIFVEVKNKFETAIGILKKEKITIDPEDPAVVSHYAKVMKTIREKASLLPESQDILSTIEIETQDIPDARTYLLTLKEIRVKRGLTDDLGAEALMIDALDKVEKDLKKPLLRNDKKGMDLLLAEFDKINKKLGIRKEDLPKYEEELELKVAKAQLEELKKDALEAMETQKKRYY	100	1e-119	KRH16734.1	hypothetical protein GLYMA_14G174100 [Glycine max]	72	2e-87	sp|Q9SJ12|ATP7_ARATH	Probable ATP synthase 24 kDa subunit, mitochondrial OS=Arabidopsis thaliana GN=At2g21870 PE=1 SV=1	-	-	-	-	-	-	-	-	GO:0009555//pollen development	-	-
25	XP_003523436.1	aldehyde dehydrogenase family 3 member H1 [Glycine max]	2.46	53299.2	0.033	1	1	XP_003526638.1	1.645	9	0.009818	XP_003523436.1	MSGEETQRNVFGAETASSLVKELRDNFGKGTTRSYEWRVSQVKALLKAVVENEDQIVGALCSDLAKPPLETVVYEIGMFQNSCEVILKELKHWMTPEKVKTSIRTFPSSAEIVPEPLGVVLVISAWNYPILLSLDPVVGAIAAGNAVVLKPSEIAPATSSVLAKLIEKYMDNSFVRVVEGAVDETTALLQQKWNKIFYTGNGRVGKIVMTAAAKHLTPVVLELGGKSPVVVDSNNNLLVAARRIIAGKWGLNNGQACISPDYVITTKDYAPKLVDTLKTELESFYGRNPLESEDLSRIVSSNHFARLSKLLNDDKVSGKIVYGGEKDEKKLRIAPTILLDVPQDSSIMGEEIFGPLLPIITVNKLEESIDVINSGAKPLAAYVFTTDNKFKEQFVKNVS…	100	0	XP_003523436.1	PREDICTED: aldehyde dehydrogenase family 3 member H1 [Glycine max]	68.48	0	sp|Q70DU8|AL3H1_ARATH	Aldehyde dehydrogenase family 3 member H1 OS=Arabidopsis thaliana GN=ALDH3H1 PE=1 SV=2	At1g44170	695	0	KOG2456	Aldehyde dehydrogenase	C	Energy production and conversion	K00128|1|0.0|993|gmx:100803104|aldehyde dehydrogenase (NAD+) [EC:1.2.1.3]	GO:0006081//cellular aldehyde metabolic process	GO:0004030//aldehyde dehydrogenase [NAD(P)+] activity	-
231	NP_001236192.2	profilin-2 [Glycine max]	2.38	14167	0.099	1	4	NP_001235025.1;NP_001237519.1;XP_003546590.1;XP_006583560.1;XP_003516387.1	0.536	9	3.81e-06	NP_001236192.2	MSWQAYVDDHLLCDIEGNHLTHAAIIGQDGSVWAQSTDFPQFKPEEITAIMNDFNEPGSLAPTGLYLGGTKYMVIQGEPGAVIRGKKGPGGVTVKKTGAALIIGIYDEPMTPGQCNMVVERLGDYLIEQGL	100	2e-93	NP_001236192.2	profilin-2 [Glycine max]	98.46	4e-93	sp|O65809|PROF1_SOYBN	Profilin-1 OS=Glycine max GN=PRO1 PE=1 SV=1	At4g29350	223	3e-76	KOG1755	Profilin	Z	Cytoskeleton	K05759|1|3e-94|271|gmx:547670|profilin	GO:0042989//sequestering of actin monomers	GO:0003779//actin binding;GO:0003785//actin monomer binding	GO:0005856//cytoskeleton;GO:0015629//actin cytoskeleton;GO:0005938//cell cortex
421	XP_003537765.3	50S ribosomal protein L12, chloroplastic [Glycine max]	2	19744.6	0.043	1	2	XP_003540558.1	0.401	9	6.55e-06	XP_003537765.3	MASTTLTTLTLRTLSYPTPSSSYPTHLSAKPSSLQFPNLSHRAATTRRPRVVVSAVEAPEKITKLGDEIAGLTLEEAKNLVDFLQDKLGVSAAAFAPVAVAAGAGGAVADAPAVVEEKTEFDVVIEEVPSNARIAVIKAVRALTNLALKEAKELIEGLPKKFKEGISKDEAEDAKKQLEEAGAKVTIA	100	4e-130	XP_003537765.3	PREDICTED: 50S ribosomal protein L12, chloroplastic-like [Glycine max]	62.63	8e-64	sp|P36210|RK121_ARATH	50S ribosomal protein L12-1, chloroplastic OS=Arabidopsis thaliana GN=RPL12A PE=2 SV=1	At3g27830	195	2e-63	KOG1715	Mitochondrial/chloroplast ribosomal protein L12	J	Translation, ribosomal structure and biogenesis	K02935|1|7e-131|368|gmx:100779891|large subunit ribosomal protein L7/L12	GO:0006412//translation	GO:0003735//structural constituent of ribosome	GO:0005840//ribosome
330	XP_006577714.1	peroxiredoxin-2E-1, chloroplastic-like [Glycine max]	1.88	22543.7	0.053	1	3	XP_003554415.1	0.893	9	0.01709	XP_006577714.1	MDGLPTLSTILQSSVTTSPPPLSSHPKPSLPNSLIFGDKLQEATFSYLDSDGEVKTTTLSDLTNGKKAVLFAVPGAFTPTCSQKHVPGFVEKSGELRAKGVDTIACISVNDAFVMKACNGTFTKAIGVELDLSDKPVGLGVRSRRYALLAEDGVVKLFNLEEGGAFTFRTSSTFFEIIVILLLPLFNRVGVLLITWMGYYNNFLGWC	100	2e-150	XP_006577714.1	PREDICTED: peroxiredoxin-2E-1, chloroplastic-like [Glycine max]	57.84	2e-68	sp|Q69TY4|PR2E1_ORYSJ	Peroxiredoxin-2E-1, chloroplastic OS=Oryza sativa subsp. japonica GN=PRXIIE-1 PE=2 SV=1	At3g52960	204	2e-66	KOG0541	Alkyl hydroperoxide reductase/peroxiredoxin	O	Posttranslational modification, protein turnover, chaperones	K03386|1|4e-39|135|ath:AT1G60740|peroxiredoxin (alkyl hydroperoxide reductase subunit C) [EC:1.11.1.15]!K11187|2|2e-24|99.0|cvr:CHLNCDRAFT_36706|peroxiredoxin 5, atypical 2-Cys peroxiredoxin [EC:1.11.1.15]	GO:0045454//cell redox homeostasis	GO:0016491//oxidoreductase activity	GO:0005623//cell
82	XP_025984179.1	brefeldin A-inhibited guanine nucleotide-exchange protein 2 isoform X2 [Glycine max]	1.81	158614	0.006	1	1	XP_014630702.1;XP_003521643.1;XP_003552344.1;XP_003534607.1	0.698	9	0.006688	XP_025984179.1	MVTFFDRETLHFQQKSFLGAIKQYLCLSLLKNSASTLLIVFQLSCSIFISLVSRFRAGLKAEIGVFFPMIVLRVLENVSQPNFQQKMTVLRFLDKLCVDSQILVDIFINYDCDVNSSNIFERMVNGLLKTAQGVPPGVMTTLLPPQEATLKLEAMKSLVAVLKSMGDWMNKQLRIPDPHSAKKVEATDNSPESGGFTMVNGNGEDPVDGSDSQSEVSNDASDVSTIEQRRAYKLELQEGISLFNRKPKKGIEFLINAKKVGDSPEEIAAFLKDASGLNKTLIGDYLGEREELSLKVMHAYVDSFNFQGMEFDEAIRVFLQGFRLPGEAQKIDRIMEKFAERYCKCNPKAFSSADTAYVLAYSVIMLNTDAHNPMVKNKMSADDFIRNNRGIDDGKDLPE…	100	0	XP_014630702.1	PREDICTED: brefeldin A-inhibited guanine nucleotide-exchange protein 2 [Glycine max]	76.07	0	sp|Q9LZX8|BIG2_ARATH	Brefeldin A-inhibited guanine nucleotide-exchange protein 2 OS=Arabidopsis thaliana GN=BIG2 PE=2 SV=1	At3g60860	2165	0	KOG0929	Guanine nucleotide exchange factor	U	Intracellular trafficking, secretion, and vesicular transport	K18442|1|0.0|2863|gmx:100798955|brefeldin A-inhibited guanine nucleotide-exchange protein	GO:0032012//regulation of ARF protein signal transduction	GO:0005086//ARF guanyl-nucleotide exchange factor activity	GO:0005829//cytosol
434	XP_003517606.1	presequence protease 2, chloroplastic/mitochondrial [Glycine max]	1.81	122069	0.011	1	1	-	0.551	9	0.001163	XP_003517606.1	MERAALVRCLPCSSVLCRRYLHSHSHLCRPSSSISIIPSLSLPTIRPLCLPRRRSSSSSRLLPLYFRTTINRKHFSSLAPRAVLSPSPSSGFAEVNDEVALKLGFEKVSEEFIPECKSKAVLFRHIKTGAQVMSVSNDDDNKVFGIVFRTPPKDSTGIPHILEHSVLCGSRKYPLKEPFVELLKGSLHTFLNAFTYPDRTCYPVASTNAKDFYNLVDVYLDAVFFPRCVEDFQIFQQEGWHFELNDPSEDITYKGVVFNEMKGVYSQPDNILGRAAQQALFPDTTYGVDSGGDPRVIPKLTFEEFKEFHRKYYHPSNSRIWFYGDDDPNERLRILSEYLDLFDSSLASHESRVEPQTLFSKPVRIVETYPAGEGGDLKKKHMVCLNWLLSDKPLDLETE…	100	0	XP_003517606.1	PREDICTED: presequence protease 2, chloroplastic/mitochondrial [Glycine max]	78.78	0	sp|Q8VY06|PREP2_ARATH	Presequence protease 2, chloroplastic/mitochondrial OS=Arabidopsis thaliana GN=PREP2 PE=1 SV=1	At3g19170	1672	0	KOG2019	Metalloendoprotease HMP1 (insulinase superfamily)	RO	General function prediction only;Posttranslational modification, protein turnover, chaperones	K06972|1|0.0|2227|gmx:100778773|presequence protease [EC:3.4.24.-]	GO:0006508//proteolysis	GO:0003824//catalytic activity;GO:0008233//peptidase activity;GO:0046872//metal ion binding	-
262	XP_003525659.1	nucleoside diphosphate kinase 2, chloroplastic [Glycine max]	1.75	25211.1	0.04	1	2	NP_001241517.1;XP_025981282.1	0.647	9	0.008955	XP_003525659.1	MEAVCGSVWVTSSLPRSPKSTLSLFRSTHQHLTAFPSQSHLFLYHPPPYANAKTLRARTSSKPAIFLPHLIASLEQVDQTYIMVKPDGVQRGLVGEIISRFEKKGFKLTGLKLFQCSKELAEEHYKDLKQKSFFPKLIDYITSGPVVCMAWEGVGVVASARKLIGATDPLQAEPGTIRGDLAVQTGRNVVHGSDSPENGKREIALWFKEGEVCEWTPVQAPWLRE	100	1e-167	XP_003525659.1	PREDICTED: nucleoside diphosphate kinase 2, chloroplastic [Glycine max]	74.46	4e-121	sp|P47923|NDK2_PEA	Nucleoside diphosphate kinase 2, chloroplastic OS=Pisum sativum GN=NDPK2 PE=1 SV=1	At5g63310	296	2e-102	KOG0888	Nucleoside diphosphate kinase	F	Nucleotide transport and metabolism	K00940|1|3e-168|466|gmx:100500478|nucleoside-diphosphate kinase [EC:2.7.4.6]	GO:0006228//UTP biosynthetic process;GO:0006241//CTP biosynthetic process;GO:0006183//GTP biosynthetic process	GO:0004550//nucleoside diphosphate kinase activity;GO:0005524//ATP binding	GO:0005622//intracellular
294	YP_538747.1	ribulose-1,5-bisphosphate carboxylase/oxygenase large subunit (chloroplast) [Glycine max]	1.73	53014.6	0.046	2	8	-	0.444	9	0.0006375	YP_538747.1	MSPQTETKASVGFKAGVKDYKLTYYTPDYETKDTDILAAFRVTPQPGVPPEEAGAAVAAESSTGTWTTVWTDGLTSLDRYKGRCYGLEPVAGEENQYIAYVAYPLDLFEEGSVTNMFTSIVGNVFGFKALRALRLEDLRIPTAYIKTFQGPPHGIQVERDKLNKYGRPLLGCTIKPKLGLSAKNYGRAVYECLRGGLDFTKDDENVNSQPFMRWRDRFLFCAEAIFKSQAETGEIKGHYLNATAGTCEEMMKRAVFARELGVPIVMHDYLTGGFTANTSLAHYCRDNGLLLHIHRAMHAVIDRQKNHGMHFRVLAKALRLSGGDHVHAGTVVGKLEGEREITLGFVDLLRDDFVEKDRSRGIYFTQDWVSLPGVLPVASGGIHVWHMPALTEIFGDDSV…	100	0	KHM99324.1	Ribulose bisphosphate carboxylase large chain [Glycine soja]	100	0	sp|P27066|RBL_SOYBN	Ribulose bisphosphate carboxylase large chain OS=Glycine max GN=rbcL PE=1 SV=3	-	-	-	-	-	-	-	K01601|1|0.0|988|gmx:3989271|ribulose-bisphosphate carboxylase large chain [EC:4.1.1.39]	GO:0009853//photorespiration;GO:0019253//reductive pentose-phosphate cycle	GO:0004497//monooxygenase activity;GO:0000287//magnesium ion binding;GO:0016984//ribulose-bisphosphate carboxylase activity	GO:0009507//chloroplast
290	XP_003529252.1	probable N-acetyl-gamma-glutamyl-phosphate reductase, chloroplastic [Glycine max]	1.69	43088.5	0.028	1	4	XP_003555702.1	0.696	9	0.02257	XP_003529252.1	MSAISFSSTHLHSWKNPKGFGKVRKQRDGKLLVKCSSKSGNPTSLQNGVRVGVLGASGYTGSEVMRLLANHPQFGIALMTADRKAGQPISSVFPHLSTRDLPDLIAIKDANFSDVDAVFCCLPHGTTQEIIKGLPKHLKIVDLSADFRLKDLSEYEEWYGQPHRAPDLQKEAIYGLTEVLREEIKNARLVANPGCYPTSVQLPLVPLIKASLIELKNIIIDAKSGVSGAGRSAKENLLFTEVTEGLNSYGVTLHRHVPEIEQGLADASGSKVTVSFTPHLIPMSRGMQSTIYVEMAPGVRIEDLYQQLKLSYENEEFVFVLENGVIPRTHSVKGTNYCLINVFPDRIPGRAIIISVIDNLVKGASGQALQNLNLLMGFPENLGLHYLPLFP	100	0	XP_003529252.1	PREDICTED: probable N-acetyl-gamma-glutamyl-phosphate reductase, chloroplastic [Glycine max]	74.86	0	sp|Q93Z70|ARGC_ARATH	Probable N-acetyl-gamma-glutamyl-phosphate reductase, chloroplastic OS=Arabidopsis thaliana GN=At2g19940 PE=1 SV=2	At2g19940	513	0	KOG4354	N-acetyl-gamma-glutamyl-phosphate reductase	E	Amino acid transport and metabolism	K00145|1|0.0|805|gmx:100788347|N-acetyl-gamma-glutamyl-phosphate reductase [EC:1.2.1.38]	GO:0006526//arginine biosynthetic process	GO:0003942//N-acetyl-gamma-glutamyl-phosphate reductase activity;GO:0046983//protein dimerization activity;GO:0051287//NAD binding	GO:0005737//cytoplasm
144	XP_003527042.1	protein EDS1L [Glycine max]	1.68	70738.4	0.01	1	2	-	0.723	9	0.02809	XP_003527042.1	MAVGSLGDNIGLKEEFITNVCGLAFQANMSPENLYHFHEIEIFSEIYHVFSFSGSWNPHEWLVNNKPFGETKIDHALFPSLRSIGNDEAALVNEGFAKRFDLILKTSSIKSEVNKAMVDGKQVVFTGHSSGAAIAILATFWALEEYLNPTKPQNLKHPFCVTFGSPLIGNHIFSHSSRRENWSHYFIHFVLRYDIVPRILLAPFSSVGQTFSSILQILDPNFETSTQDPTRNCVISQFYSTVMTNAATVTSHAAGILMGSTNMLLETVTNFVDLSPYRPFGTYVFCNGNGQLIVVKNSDAVLQLLFHTAQLSNFAELEEVANNSILQHLNYVAELQESLGMQNVVYLEQLEQLPLSADGSNSDVATALDGLGLSPRARLCLRAAANLATRKLDNEDKIK…	100	0	XP_003527042.1	PREDICTED: protein EDS1L-like [Glycine max]	39.14	6e-138	sp|Q9SU71|EDSBC_ARATH	Protein EDS1B OS=Arabidopsis thaliana GN=EDS1B PE=1 SV=1	-	-	-	-	-	-	-	K18875|1|0.0|1285|gmx:100820237|enhanced disease susceptibility 1 protein	GO:0006629//lipid metabolic process	GO:0016787//hydrolase activity	-
116	NP_001341836.1	2-cys peroxiredoxin [Glycine max]	1.62	28437.6	0.023	1	1	XP_003519127.1	0.306	9	7.33e-05	NP_001341836.1	MACSATSASLFSANPTPLFSPKSSLSLPNNSLHLNPLPTRPSLSLTRPSHTRRSFVVKASSSELPLVGNTAPDFEAEAVFDQEFINVKLSDYIGKKYVVLFFYPLDFTFVCPTEITAFSDRHAEFEALNTEILGVSVDSVFSHLAWIQTDRKSGGLGDLNYPLISDVTKSISKSYGVLIPDQGIALRGLFIIDKEGVIQHSTINNLAIGRSVDETKRTLQALQYVQENPDEVCPAGWKPGEKSMKPDPKLSKDYFAAV	100	0	NP_001341836.1	2-cys peroxiredoxin [Glycine max]	87.32	1e-141	sp|Q9C5R8|BAS1B_ARATH	2-Cys peroxiredoxin BAS1-like, chloroplastic OS=Arabidopsis thaliana GN=At5g06290 PE=2 SV=3	At5g06290	398	2e-141	KOG0852	Alkyl hydroperoxide reductase, thiol specific antioxidant and related enzymes	O	Posttranslational modification, protein turnover, chaperones	K03386|1|0.0|529|gmx:100786990|peroxiredoxin (alkyl hydroperoxide reductase subunit C) [EC:1.11.1.15]	GO:0045454//cell redox homeostasis	GO:0051920//peroxiredoxin activity	GO:0005623//cell
302	XP_006575386.1	60S ribosomal protein L10 [Glycine max]	1.59	25486.3	0.027	1	1	NP_001238050.1;XP_003523292.1;NP_001238332.1;XP_003553186.2	0.623	9	0.03856	XP_006575386.1	MGRRPARCYRQIKNKPYPKSRFCRGVPDPKIRIYDVGMKKKGVDEFPFCVHLVSWEKENVSSEALEAARIACNKYMAKFAGKDAFHLRVRVHPFHVLRINKMLSCAGADRLQTGMRGAFGKPQGTCARVAIGQVLLSVRCKDSNSHHAQEALRRAKFKFPGRQKIIVSRKWGFTKFSRSDYLKFKSENRIVPDGVNAKLLGCHGPLANREPGRAFLDTATGS	100	3e-165	XP_006575386.1	PREDICTED: 60S ribosomal protein L10 [Glycine max]	91.82	3e-156	sp|Q9SPB3|RL10_VITRI	60S ribosomal protein L10 OS=Vitis riparia GN=RPL10 PE=2 SV=1	At1g26910	409	5e-147	KOG0857	60s ribosomal protein L10	J	Translation, ribosomal structure and biogenesis	K02866|1|6e-166|459|gmx:100777196|large subunit ribosomal protein L10e	GO:0006412//translation;GO:0000027//ribosomal large subunit assembly	GO:0003735//structural constituent of ribosome;GO:0003723//RNA binding	GO:0005840//ribosome;GO:0022625//cytosolic large ribosomal subunit
399	XP_014629812.1	eukaryotic translation initiation factor 5A3 isoform X1 [Glycine max]	1.56	14929.4	0.059	1	1	NP_001238467.2;XP_025983620.1;NP_001236395.1;NP_001235981.2	0.406	9	0.002601	XP_014629812.1	MSDEEHHFESKADAGASKTYPQQAGTIRKNGYIVIKGRPCKVVEVSTSKTGKHGHAKCHFVGIDIFTAKKLEDIVPSSHNCDVPHVNRTDYQLIDIAEDGFIKDGFAEGKDLVVSVMSAMGEEQICALKDIGPKN	100	2e-96	XP_014629812.1	PREDICTED: eukaryotic translation initiation factor 5A3 isoform X1 [Glycine max]	81.13	8e-89	sp|P24922|IF5A2_NICPL	Eukaryotic translation initiation factor 5A-2 OS=Nicotiana plumbaginifolia GN=EIF-5A2 PE=2 SV=1	At1g13950	240	9e-83	KOG3271	Translation initiation factor 5A (eIF-5A)	J	Translation, ribosomal structure and biogenesis	K03263|1|4e-92|267|gmx:100820467|translation initiation factor 5A	GO:0006452//translational frameshifting;GO:0045901//positive regulation of translational elongation;GO:0045905//positive regulation of translational termination	GO:0003746//translation elongation factor activity;GO:0043022//ribosome binding;GO:0003743//translation initiation factor activity	-
334	NP_001336714.1	40S ribosomal protein S20-2 [Glycine max]	1.54	13738.3	0.098	1	2	NP_001235558.2;NP_001237853.1;XP_003521199.1;NP_001238046.1;XP_014619850.1	0.374	9	0.002009	NP_001336714.1	MAYAAMKPTKPGLEESQEQIHKIRITLSSKNVKNLEKVCADLVRGAKDKHLRVKGPVRMPTKVLNITTRKSPCGEGTNTWDRFELRVHKRVIDLYSSPDVVKQITSITIEPGVEVEVTIADA	100	7e-86	XP_014619850.1	PREDICTED: 40S ribosomal protein S20-2-like [Glycine max]	90.16	1e-77	sp|Q9STY6|RS202_ARATH	40S ribosomal protein S20-2 OS=Arabidopsis thaliana GN=RPS20B PE=2 SV=1	At3g47370	224	2e-77	KOG0900	40S ribosomal protein S20	J	Translation, ribosomal structure and biogenesis	K02969|1|1e-86|251|gmx:100813093|small subunit ribosomal protein S20e	GO:0006412//translation	GO:0003735//structural constituent of ribosome;GO:0003723//RNA binding	GO:0015935//small ribosomal subunit
411	NP_001235587.1	L-ascorbate peroxidase 2 [Glycine max]	1.53	27147.8	0.036	1	1	-	0.537	9	0.01852	NP_001235587.1	MGKSYPTVSADYQKAVEKAKKKLRGFIAEKRCAPLMLRLAWHSAGTYDVSSKTGGPFGTIKHPSELAHGANNGLDIAVRLLEPLKAEFPILSYADFYQLAGVVAVEVTGGPEVPFHPGREDKPEPPPEGRLPDATKGSDHLRDVFGKAMGLSDRDIVALSGGHTIGAAHKERSGFEGPWTSNPLIFDNSYFKELLSGEKEGLLQLPSDKALLSDPVFRPLVEKYASDEDAFFADYAEAHQKLSELGFAEA	100	0	NP_001235587.1	L-ascorbate peroxidase 2 [Glycine max]	90	2e-170	sp|P48534|APX1_PEA	L-ascorbate peroxidase, cytosolic OS=Pisum sativum GN=APX1 PE=1 SV=2	-	-	-	-	-	-	-	K00434|1|0.0|507|gmx:606508|L-ascorbate peroxidase [EC:1.11.1.11]	GO:0006979//response to oxidative stress;GO:0042744//hydrogen peroxide catabolic process;GO:0034599//cellular response to oxidative stress;GO:0000302//response to reactive oxygen species	GO:0020037//heme binding;GO:0004130//cytochrome-c peroxidase activity;GO:0016688//L-ascorbate peroxidase activity;GO:0004601//peroxidase activity	GO:0009507//chloroplast
366	XP_014619949.1	putative bZIP domain class transcription factor isoform X1 [Glycine max]	1.52	53525.6	0.02	1	1	NP_001345592.1	0.447	9	0.003602	XP_014619949.1	MGENEEAMQRLHFLKQPLNMEQLSIPQFNPSQMRARQHHHQNQFDGGNSNKRAGIPPSHPHPIPPISPYSQIPVSRQHNNISPTPTHTRSLSQPSFFSLDSLPPLSPSPFRDSSSTSVSEAADVSMEDRDVSSHSLLPPSPFSRTLNNSNLPLPPRKAHRRSNSDIPFGFSTVLQSSPPLIPLRNPVSAKPAQLVKRETPWDRGVENNNNNNVEGSGEKKSPEGEVVDDLFSAYMNLDSFDALNSSGTDDKNGGENRDDLDSRASGTKTNGGDSSDNEAESSVNESGDGGVRQGGNEKREGMKRSAGGEIAPTTRHYRSVSMDSFIGKLNFDEESPKLPPSPGQRSALMSPAGGIDGNSAAFSLEFGNGEFSGPELKKIMANEKLAEIALIDPKRAKRI…	100	0	XP_014619949.1	PREDICTED: probable transcription factor PosF21 isoform X2 [Glycine max]	37.57	3e-44	sp|Q04088|POF21_ARATH	Probable transcription factor PosF21 OS=Arabidopsis thaliana GN=POSF21 PE=2 SV=1	-	-	-	-	-	-	-	K20557|1|3e-46|168|psom:113283160|transcription factor VIP1		GO:0003700//DNA binding transcription factor activity;GO:0003677//DNA binding	GO:0005634//nucleus
498	NP_001235130.2	heat shock 22 kDa protein, mitochondrial isoform 2 [Glycine max]	1.52	23722.1	0.052	1	1	NP_001336095.1	0.47	9	0.01028	NP_001235130.2	MASSLIAKRFLSSSLLSRSLLRPAASASHRSFNTNAMRQYDNRADDHSTDIDRHSERSFPSTARRDDIFSDVLDPFFPTRSLSQVLNMMDQVMDNPFLSASRGIGAGAGVRRGWDARETEDALHLRVDMPGLGKEDVKISVEQNTLIIKGEGAKEGDEEESARRYTSRIDLPDKLYKIDQIRAEMKNGVLKVVVPKMKEEERKDVISVKVE	100	2e-153	NP_001235130.2	heat shock 22 kDa protein, mitochondrial isoform 2 [Glycine max]	76.99	5e-104	sp|Q39818|HS22M_SOYBN	Heat shock 22 kDa protein, mitochondrial OS=Glycine max GN=HSP23.9 PE=2 SV=1	At4g25200	230	9e-77	KOG0710	Molecular chaperone (small heat-shock protein Hsp26/Hsp42)	O	Posttranslational modification, protein turnover, chaperones	K13993|1|4e-154|429|gmx:547852|HSP20 family protein	-	-	-
286	XP_003539349.1	CBS domain-containing protein CBSX1, chloroplastic [Glycine max]	1.49	25106.3	0.044	1	1	XP_003517313.1	0.449	9	0.01542	XP_003539349.1	MDSALSRLHLHNLPPLSSAAHRPLLQPLAAAASFYRSSPPLPRLRLSPLLAANTLTANDVSPRSGLYTVGDFMTKKEDLHVVKPTTSVDEALEILVENRITGFPVIDDNWKLVGVVSDYDLLALDSISGHGLKDNNMFPEVDSTWKTFNEVQKLLSKTNGKLIGELMTTAPMVVRETTNLEDAARLLLETKFRRLPVVDAEGRLVGIITRGNVVRAALHMKQANQKKE	100	6e-166	XP_003539349.1	PREDICTED: CBS domain-containing protein CBSX1, chloroplastic [Glycine max]	73.71	4e-103	sp|O23193|CBSX1_ARATH	CBS domain-containing protein CBSX1, chloroplastic OS=Arabidopsis thaliana GN=CBSX1 PE=1 SV=2	CE26636	50.1	8e-07	KOG1764	5'-AMP-activated protein kinase, gamma subunit	C	Energy production and conversion	K14595|1|4e-77|248|mtr:MTR_4g485640|abscisate beta-glucosyltransferase [EC:2.4.1.263]	-	-	-
146	XP_014634736.1	probable aldo-keto reductase 2 [Glycine max]	1.45	37788.3	0.041	1	1	XP_003527296.1;XP_003527298.1	0.314	9	0.000983	XP_014634736.1	MARVGRMKLGSQGMEVSLQGLGCMGMSAFYGPPKPDPDMIALIHHAVQTGVTFLDTSDVYGPHTNELLLGKALKGGVRDEVELATKFGINVAEGKREIRGDPAYVRAACEGSLKRLGIDCIDLYYQHRIDTRVPIEITIGELKKLVEEGKIKYIGLSEASASTIRRAHAVHPITAVQLEWSLWSRDVEEEIVPTCRELGIGIVAYSPLGRGFLSSGPKLLENLTQDDFRQSLPRFQPENLEQNKTIFERVNELAAKKGCTPSQLALAWVHHQGKDVCPIPGTTKIENFNQNIGALSVKLTPEDMAELESFAAADAVKGGRYMDGFATWKESDTPPLSSWKAA	100	0	XP_014634736.1	PREDICTED: probable aldo-keto reductase 2 [Glycine max]	81.76	0	sp|Q7XT99|AKR2_ORYSJ	Probable aldo-keto reductase 2 OS=Oryza sativa subsp. japonica GN=Os04g0338000 PE=2 SV=2	At1g60690	564	0	KOG1575	Voltage-gated shaker-like K+ channel, subunit beta/KCNAB	C	Energy production and conversion	K05275|1|8e-32|126|ppp:112279415|pyridoxine 4-dehydrogenase [EC:1.1.1.65]	-	-	-
423	NP_001343409.1	putative 18.5 kDa class I heat shock protein [Glycine max]	1.45	17364.9	0.211	1	11	-	0.538	9	0.03237	NP_001343409.1	MSLIPNIFGGRRSNVFDPFKDFPFPNSVSTSFPEFSRENSAFVSTRVDWKETPEAHVFKADIPGLKKEEVKVQIEDDKVLQISGERNVENEDKNDTWHRVERSSGKFMRRFRLPENAKVNEVKASMENGVLTVTVPKKEVKNHDVKAIEISG	100	1e-106	KRH20405.1	hypothetical protein GLYMA_13G176500 [Glycine max]	87.58	1e-95	sp|P05478|HSP16_SOYBN	18.5 kDa class I heat shock protein OS=Glycine max GN=HSP18.5-C PE=3 SV=1	At1g53540	201	7e-67	KOG0710	Molecular chaperone (small heat-shock protein Hsp26/Hsp42)	O	Posttranslational modification, protein turnover, chaperones	K13993|1|2e-107|306|gmx:111240470|HSP20 family protein	-	-	-
81	XP_003537679.1	phosphoserine aminotransferase 1, chloroplastic [Glycine max]	1.43	45349.8	0.027	1	2	XP_003517140.1	0.468	9	0.03037	XP_003537679.1	MSMATTSPHTALFQNRTNPFTLSSFKPTSIKCATQLHTQAPPLTHSQDRVFNFAAGPATLPENVLLRAQSELYNWRGSGMSVMEMSHRGKEFLSIIQKAESDLRALLQIPPEYSVLFLQGGATSQFAAVPLNLCSSPDSAVDYVVTGSWSDKAAKEAQKYSKPTVIWSGKSEKYTKIPSFHDLELNENSGYLHICANETIHGVEYKDYPVPKSGVLVADMSSNFCSKPVDVSRFGVIYAGAQKNVGPSGVTIVIIRKDLIGNAQGFTPVMFDYKIHDENNSLYNTPPCYGIYMCGLVFEDLLEQGGLGEVERKNQKKAEILYSAIDGSKGFYKCPVEKSVRSLMNVPFTLEKSELEGEFIKEAAKEKMVQLKGHRSVGGMRASIYNAMPLAGVEKLVAF…	100	0	XP_003537679.1	PREDICTED: phosphoserine aminotransferase 1, chloroplastic [Glycine max]	78.62	0	sp|Q96255|SERB1_ARATH	Phosphoserine aminotransferase 1, chloroplastic OS=Arabidopsis thaliana GN=PSAT1 PE=1 SV=1	At4g35630	664	0	KOG2790	Phosphoserine aminotransferase	HE	Coenzyme transport and metabolism;Amino acid transport and metabolism	K00831|1|0.0|854|gmx:100779355|phosphoserine aminotransferase [EC:2.6.1.52]	GO:0006564//L-serine biosynthetic process	GO:0004648//O-phospho-L-serine:2-oxoglutarate aminotransferase activity	GO:0009570//chloroplast stroma
371	XP_003525794.1	hsp70-Hsp90 organizing protein 1-like [Glycine max]	1.42	63722.9	0.034	2	2	NP_001236261.2	0.481	9	0.04963	XP_003525794.1	MAEEAKAKGNAAFSAGDFAAAVRHFTDAIALSPSSHVLYSNRSAAHASLQKYAEALADAQKTVDLKPDWPKAYSRLGAALLGLRRHRDAVSAYKTGLHLDPDNAALKSGLADAHAAASRPPPTSPFATAFSGPDMWARLTADPTARANLQDPEFVKIMQDIQKDPNKFNLHLSDQRVMHAVGVLLNVKIQTPNDDNADAAGDDVSEDDPVSQSESESEPEPEPEVAEEEKEARDRKGQAQKEKEAGNAAYKKKDFETAIGHYTKALELDDEDISYLTNRAAVYLEMGKFEDCIKDCEKAVERGRELRSDYKMIARALTRKGTALAKMAKCSKDFEPAIETFQKALTEHRNPDTLKKLNEAEKAKKELEQQEYFDPKLADEEREKGNELFKQQKYPEAIK…	100	0	XP_003525794.1	PREDICTED: hsp70-Hsp90 organizing protein 1-like [Glycine max]	91.35	0	sp|Q43468|HSOP1_SOYBN	Hsp70-Hsp90 organizing protein 1 OS=Glycine max GN=HOP1 PE=1 SV=2	At4g12400	841	0	KOG0548	Molecular co-chaperone STI1	O	Posttranslational modification, protein turnover, chaperones	K09553|1|0.0|1168|gmx:100780296|stress-induced-phosphoprotein 1	-	-	-
202	NP_001237987.2	aspartate aminotransferase isoform X1 [Glycine max]	1.37	50703.8	0.028	1	1	-	0.233	9	0.000837	NP_001237987.2	MASSFLSAASHAVSPSCSLSTTHKGKPMLGGNTLRFHKGPNSFSSSRSRGRISMAVAVNVSRFEGIPMAPPDPILGVSEAFKADNSDVKLNLGVGAYRTEELQPYVLNVVKKAENLMLERGDNKEYLPIEGLAAFNKATAELLLGADNPAIKQQRVATVQGLSGTGSLRLGAALIERYFPGAKVLISAPTWGNHKNIFNDASVPWSEYRYYDPKTVGLDFEGMIEDIKSAPEGSFILLHGCAHNPTGIDPTPEQWEKIADLIEEKNHIPFFDVAYQGFASGSLDEDAASVRLFVARGIEVLVAQSYSKNLGLYAERIGAINVISSSPESAARVKSQLKRIARPMYSNPPVHGARIVADVVGNPVLFNEWKAEMEMMAGRIKNVRQQLYDSITSKDKSGK…	100	0	NP_001237987.2	aspartate aminotransferase [Glycine max]	90.72	0	sp|P26563|AATM_LUPAN	Aspartate aminotransferase P2, mitochondrial (Fragment) OS=Lupinus angustifolius PE=2 SV=1	At4g31990	778	0	KOG1411	Aspartate aminotransferase/Glutamic oxaloacetic transaminase AAT1/GOT2	E	Amino acid transport and metabolism	K00811|1|0.0|957|gmx:547792|aspartate aminotransferase, chloroplastic [EC:2.6.1.1]	GO:0009058//biosynthetic process;GO:0006520//cellular amino acid metabolic process	GO:0004069//L-aspartate:2-oxoglutarate aminotransferase activity;GO:0030170//pyridoxal phosphate binding;GO:0080130//L-phenylalanine:2-oxoglutarate aminotransferase activity	-
357	NP_001341770.1	putative triosephosphate isomerase [Glycine max]	1.36	27391.2	0.051	1	3	XP_006593480.2	0.361	9	0.01971	NP_001341770.1	MGRKFFVGGNWKCNGTTEEVKKIVTTLNEAKVPGEDVVEVVVSPPFVFLPVVKSLLRPDFHVSAQNCWVRKGGAYTGEVSAEMLVNLGIPWVIIGHSERRQLLNESNEFVGDKVAYALQQGLKVIACIGETLEQREAGTTTAVVSEQTKAIAAKISNWDNVVLAYEPVWAIGTGKVATPAQAQEVHADLRKWVHDNVSAEVAASVRIIYGGSVNGGNCKELAAQPDVDGFLVGGASLKPEFVDIINAATVKKN	100	0	NP_001341770.1	putative triosephosphate isomerase [Glycine max]	81.03	3e-155	sp|P48495|TPIS_PETHY	Triosephosphate isomerase, cytosolic OS=Petunia hybrida GN=TPIP1 PE=2 SV=1	At3g55440	429	7e-154	KOG1643	Triosephosphate isomerase	G	Carbohydrate transport and metabolism	K01803|1|0.0|513|gmx:100796274|triosephosphate isomerase (TIM) [EC:5.3.1.1]	GO:0006096//glycolytic process	GO:0004807//triose-phosphate isomerase activity;GO:0003988//acetyl-CoA C-acyltransferase activity	-
71	XP_006599411.1	V-type proton ATPase subunit C [Glycine max]	1.35	42660.6	0.024	1	1	XP_003518129.1;XP_003553974.1;XP_003548919.2	0.151	9	5.73e-05	XP_006599411.1	MATRYWVVSLPVQNSASTLWNKLQEQISKHSFDTPLYRFNIPNLRVGTLDSLLSLSDDLVKSNSFVEGVSHKIRRQIEELERVSGVMSSGLTVDGVPVDSYLTRFVWDEARYPTMSPLKEIIDGIHGQVAKIEDDLKVRVSEYNNIRSQLNAINRKQTGSLAVRDLSDLVKPEDIITSENLTTLLAIVPKYSQKDWLSSYEILTNYVVPRSSKKLYEDNEYALYTVTLFSRVADNFRTSAREEGFQIRDFEYSPESHDSRKQELEKLVEDQESLRGSLLQWCYTSYGEVFSSWMHFCAVRVFTESILRYGLPPSFLACVLAPSVKAEKKVRSILEGLSDSSNSAYWKTEDEGVGMAGLAGDADAHPYVSFTINLV	100	0	XP_006599411.1	PREDICTED: V-type proton ATPase subunit C-like [Glycine max]	81.55	0	sp|Q9SDS7|VATC_ARATH	V-type proton ATPase subunit C OS=Arabidopsis thaliana GN=VHA-C PE=1 SV=1	At1g12840	642	0	KOG2909	Vacuolar H+-ATPase V1 sector, subunit C	C	Energy production and conversion	K02148|1|0.0|770|gmx:100803728|V-type H+-transporting ATPase subunit C	GO:0015991//ATP hydrolysis coupled proton transport	GO:0046961//proton-transporting ATPase activity, rotational mechanism;GO:0008553//hydrogen-exporting ATPase activity, phosphorylative mechanism;GO:0015078//hydrogen ion transmembrane transporter activity	GO:0033180//proton-transporting V-type ATPase, V1 domain;GO:0000221//vacuolar proton-transporting V-type ATPase, V1 domain
98	XP_003548332.1	thioredoxin H9 isoform X2 [Glycine max]	1.35	15563.9	0.08	1	1	NP_001237133.1;XP_006599743.1;XP_006576196.1	0.399	9	0.03434	XP_003548332.1	MGNCLRKAHADDDSDHIVELASGNVQLITTKESWDQKLDQARKESKIVIANFSATWCGPCKVIAPHYCELSVKYPSIMFLLVDVDELADFSTSWDIKATPTFFFLKDGKEVDKLVGANKPELEKKIVVVNDVVPHKQ	100	8e-98	XP_003548332.1	PREDICTED: thioredoxin H9-like isoform X2 [Glycine max]	67.41	5e-67	sp|Q9C9Y6|TRXH9_ARATH	Thioredoxin H9 OS=Arabidopsis thaliana GN=TRX9 PE=1 SV=1	At3g08710	199	1e-66	KOG0907	Thioredoxin	O	Posttranslational modification, protein turnover, chaperones	K03671|1|2e-98|282|gmx:100790322|thioredoxin 1	GO:0045454//cell redox homeostasis;GO:0006662//glycerol ether metabolic process;GO:0034599//cellular response to oxidative stress	GO:0047134//protein-disulfide reductase activity;GO:0016671//oxidoreductase activity, acting on a sulfur group of donors, disulfide as acceptor;GO:0015035//protein disulfide oxidoreductase activity;GO:0004791//thioredoxin-disulfide reductase activity	GO:0005737//cytoplasm;GO:0005623//cell
259	NP_001341767.1	phosphoglycerate kinase [Glycine max]	1.35	42347.6	0.145	1	2	-	0.321	9	0.009782	NP_001341767.1	MATKRSVGTLKEGDLKGKRVFVRVDLNVPLDDNLNITDDTRVRAAVPTIKYLTGHGAKVILSSHLGRPKGVTPKYSLKPLVPRLSQLLGIEVTMANDSIGEEVEKLVAQLPEGGVLLLENVRFYKEEEKNDPEFAKKLASLADLYVNDAFGTAHRAHASTEGVAKYLKPSVAGFLMQKELDYLVGAVSNPKRPFAAIVGGSKVSSKIGVIESLLEKVNVLLLGGGMIFTFYKAQGYSVGSSLVEEDKLSLATTLLEKAKAKGVSLLLPTDVVIADKFAADANSKTVPASSIPDGWMGLDIGPDSIKTFGEALDKTQTVIWNGPMGVFEFDKFATGTEAIAKKLAELSGKGVTTIIGGGDSVAAVEKVGLADKMSHISTGGGASLELLEGKQLPGVLALD…	100	0	NP_001341767.1	phosphoglycerate kinase [Glycine max]	90.27	0	sp|Q42962|PGKY_TOBAC	Phosphoglycerate kinase, cytosolic OS=Nicotiana tabacum PE=2 SV=1	At1g79550	723	0	KOG1367	3-phosphoglycerate kinase	G	Carbohydrate transport and metabolism	K00927|1|0.0|795|gmx:100796458|phosphoglycerate kinase [EC:2.7.2.3]	GO:0006096//glycolytic process	GO:0004618//phosphoglycerate kinase activity;GO:0005524//ATP binding	-
14	NP_001240021.1	catalase [Glycine max]	1.34	57024.4	0.134	5	5	NP_001237571.1	0.418	9	0.04459	NP_001240021.1	MDPYKLRPSSAFNSPFWTTNSGAPVWNNNSSLTVGARGPILLEDYHLVEKLANFDRERIPERVVHARGASAKGFFEVTHDISHLTCADFLRAPGVQTPVIVRFSTVIHERGSPETLRDPRGFAVKFYTREGNFDLVGNNLPVFFVRDGMKFPDMVHALKPNPKNHIQENWRILDFFSHFPESLHMFTFLFDDLGVPQDYRHMDGFGVNTYTLINKAGKAVYVKFHWKTTSGIKCLLEEEAIKVGGANHSHATQDLHDSIAAGNYPEWKLFVQTIDPEHEDKFDFDPLDVTKTWPEDIIPLQPVGRLVLNKNIDNFFAENEQLAFCPAIVVPGVYYSDDKMLQTRIFSYADSQRHRLGPNYLQLPANAPKCAHHNNHHEGFMNFIHRDEEVNYFPSRYDP…	100	0	NP_001240021.1	catalase [Glycine max]	98.78	0	sp|O48561|CATA4_SOYBN	Catalase-4 OS=Glycine max GN=CAT4 PE=2 SV=1	At4g35090	926	0	KOG0047	Catalase	P	Inorganic ion transport and metabolism	K03781|1|0.0|1028|gmx:100037448|catalase [EC:1.11.1.6]	GO:0042542//response to hydrogen peroxide;GO:0042744//hydrogen peroxide catabolic process;GO:0006979//response to oxidative stress	GO:0046872//metal ion binding;GO:0020037//heme binding;GO:0004096//catalase activity	GO:0005777//peroxisome;GO:0005739//mitochondrion;GO:0009514//glyoxysome
